# Supplementary material for: A Protein Co-Conservation Network Model Characterizes Mutation Effects on SARS-CoV-2 Spike Protein
Source: MDPI journal article supplement (doi:10.3390/ijms24043255), 2023-02-07
Supplement: s1 [file s1]

---

*Supplementary Material*

# **A protein co-conservation network model characterizes mutations effects on SARS-CoV-2 spike protein**

**Lianjie Zeng<sup>1,2</sup>, Yitan Lu<sup>3</sup>, Wenying Yan<sup>3,4,\*</sup> and Yang Yang<sup>1,2,\*</sup>**

<sup>1</sup> School of Computer Science & Technology, Soochow University, Suzhou 215000, China

<sup>2</sup> Collaborative Innovation Center of Novel Software Technology and Industrialization, Nanjing 210000, China;

<sup>3</sup> Department of Bioinformatics, School of Biology and Basic Medical Sciences, Medical College of Soochow University, Suzhou 215123, China

<sup>4</sup> Jiangsu Province Engineering Research Center of Precision Diagnostics and Therapeutics Development, Suzhou 215123, China

\* Correspondence: wyyan@suda.edu.cn (W.Y.); yyang@suda.edu.cn (Y.Y.)

---

**Table S1** The network parameters for each node in PCCN of spike protein

See the file “TableS1.xlsx”.

**Table S2** Correlation of Stability changes of spike protein upon mutations with PCCN topological features

| The stability changes upon mutations or co-mutations<br>sites with top three topological features | Topological<br>features | Correlation  | P value      |
|---------------------------------------------------------------------------------------------------|-------------------------|--------------|--------------|
| G142D (-4.78), E156G (-3.67), C136F (-3.17)                                                       | <i>C</i>                | 0.146        | 0.146        |
|                                                                                                   | <b><i>Kw</i></b>        | <b>0.253</b> | <b>0.011</b> |
|                                                                                                   | <b><i>D</i></b>         | <b>0.242</b> | <b>0.015</b> |
|                                                                                                   | <b><i>P</i></b>         | <b>0.271</b> | <b>0.006</b> |
| G142D-E156G (-4.22), G142D-Y145H (-3.62), G142D-N439K (-3.38)                                     | <i>L</i>                | -0.029       | 0.350        |
| T95I-G142D (-2.98), G142D-N501Y (-2.88), P9L-T859N (-2.87)                                        | <i>CCS</i>              | 0.109        | 0.094        |

**Table S3** Correlation of binding free energy (BFE) changes of spike protein upon mutations with PCCN topological features

| The BFE changes upon mutations or co-mutations sites with top three topological features | Topological features | Correlation   | P value      |
|------------------------------------------------------------------------------------------|----------------------|---------------|--------------|
| Q493R(8.23), D215G (8.10), T547K(8.07)                                                   | <i>C</i>             | <b>-0.207</b> | <b>0.045</b> |
|                                                                                          | <i>K<sub>w</sub></i> | -0.050        | 0.633        |
|                                                                                          | <i>D</i>             | -0.056        | 0.595        |
|                                                                                          | <i>P</i>             | 0.048         | 0.649        |
| Q493R-T547K(8.15),T478K-Q493R(8.13),V213G-Q493R(8.12)                                    | <i>L</i>             | <b>0.179</b>  | <b>0.000</b> |
| D215G-D614G(8.05),S371F-D614G(7.99),D614G-T732A(7.97)                                    | <i>CCS</i>           | <b>0.233</b>  | <b>0.001</b> |

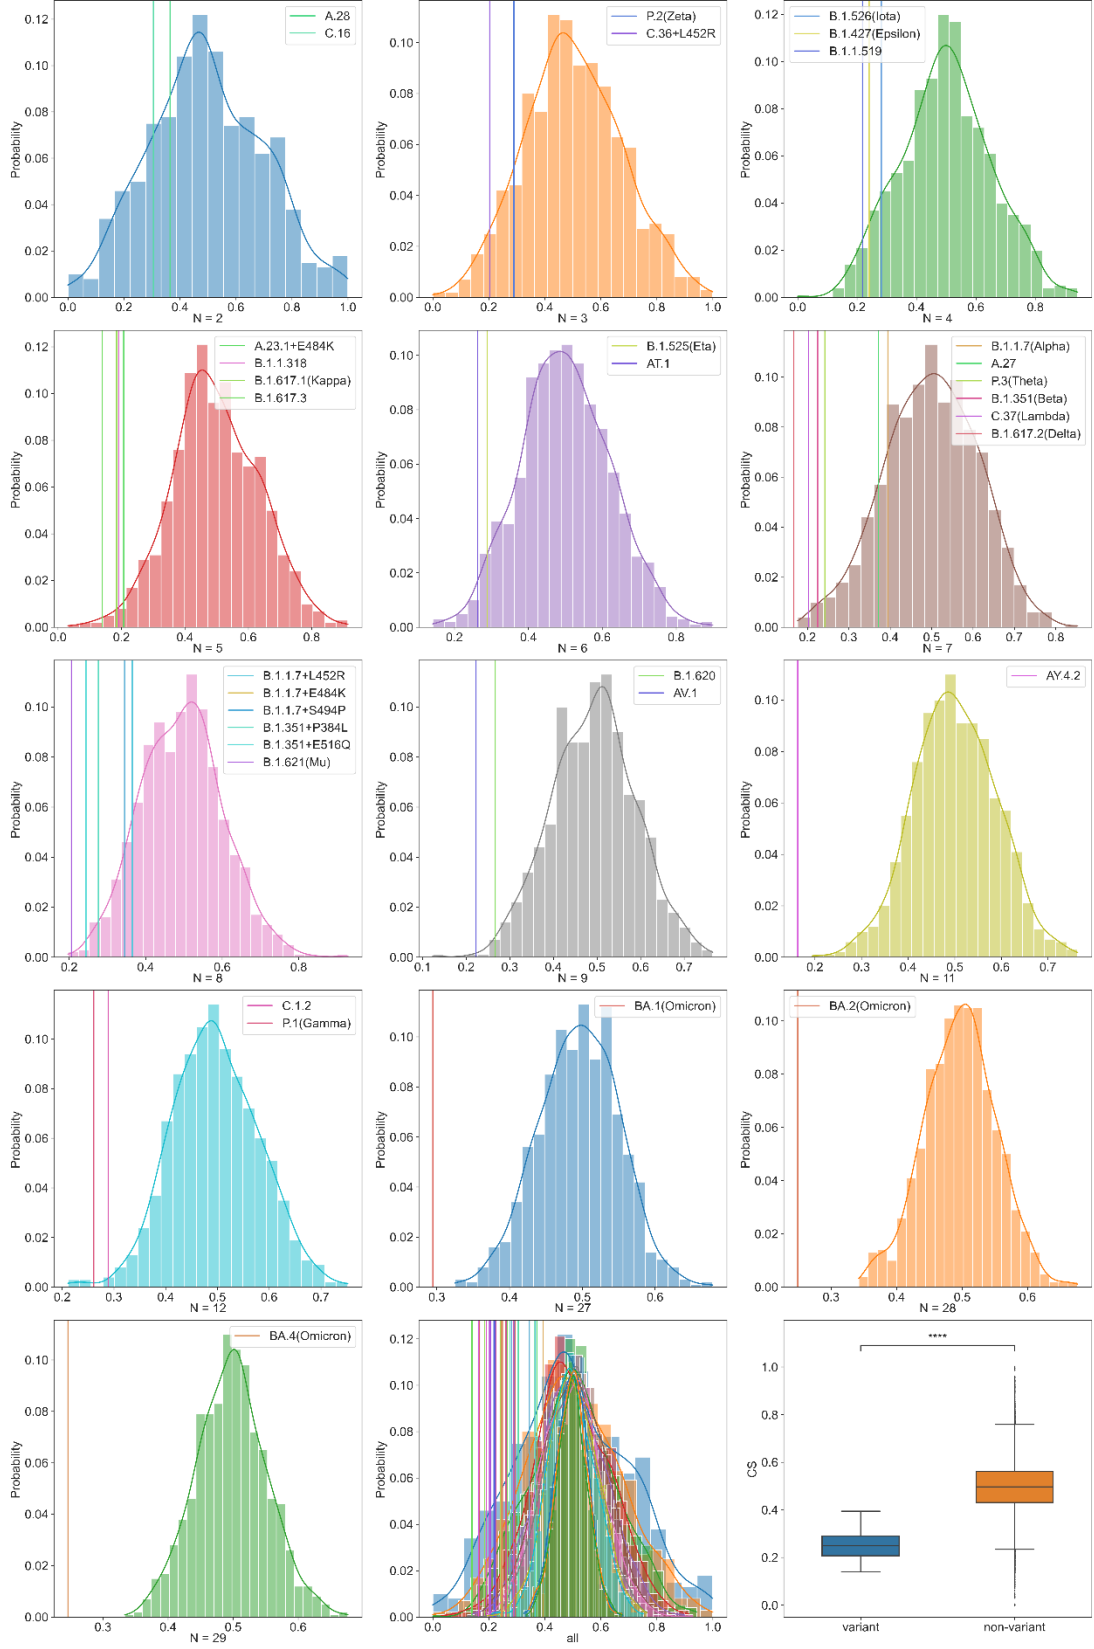

**Figure S1.** The distribution of CS for the same number of nodes in PCCN.

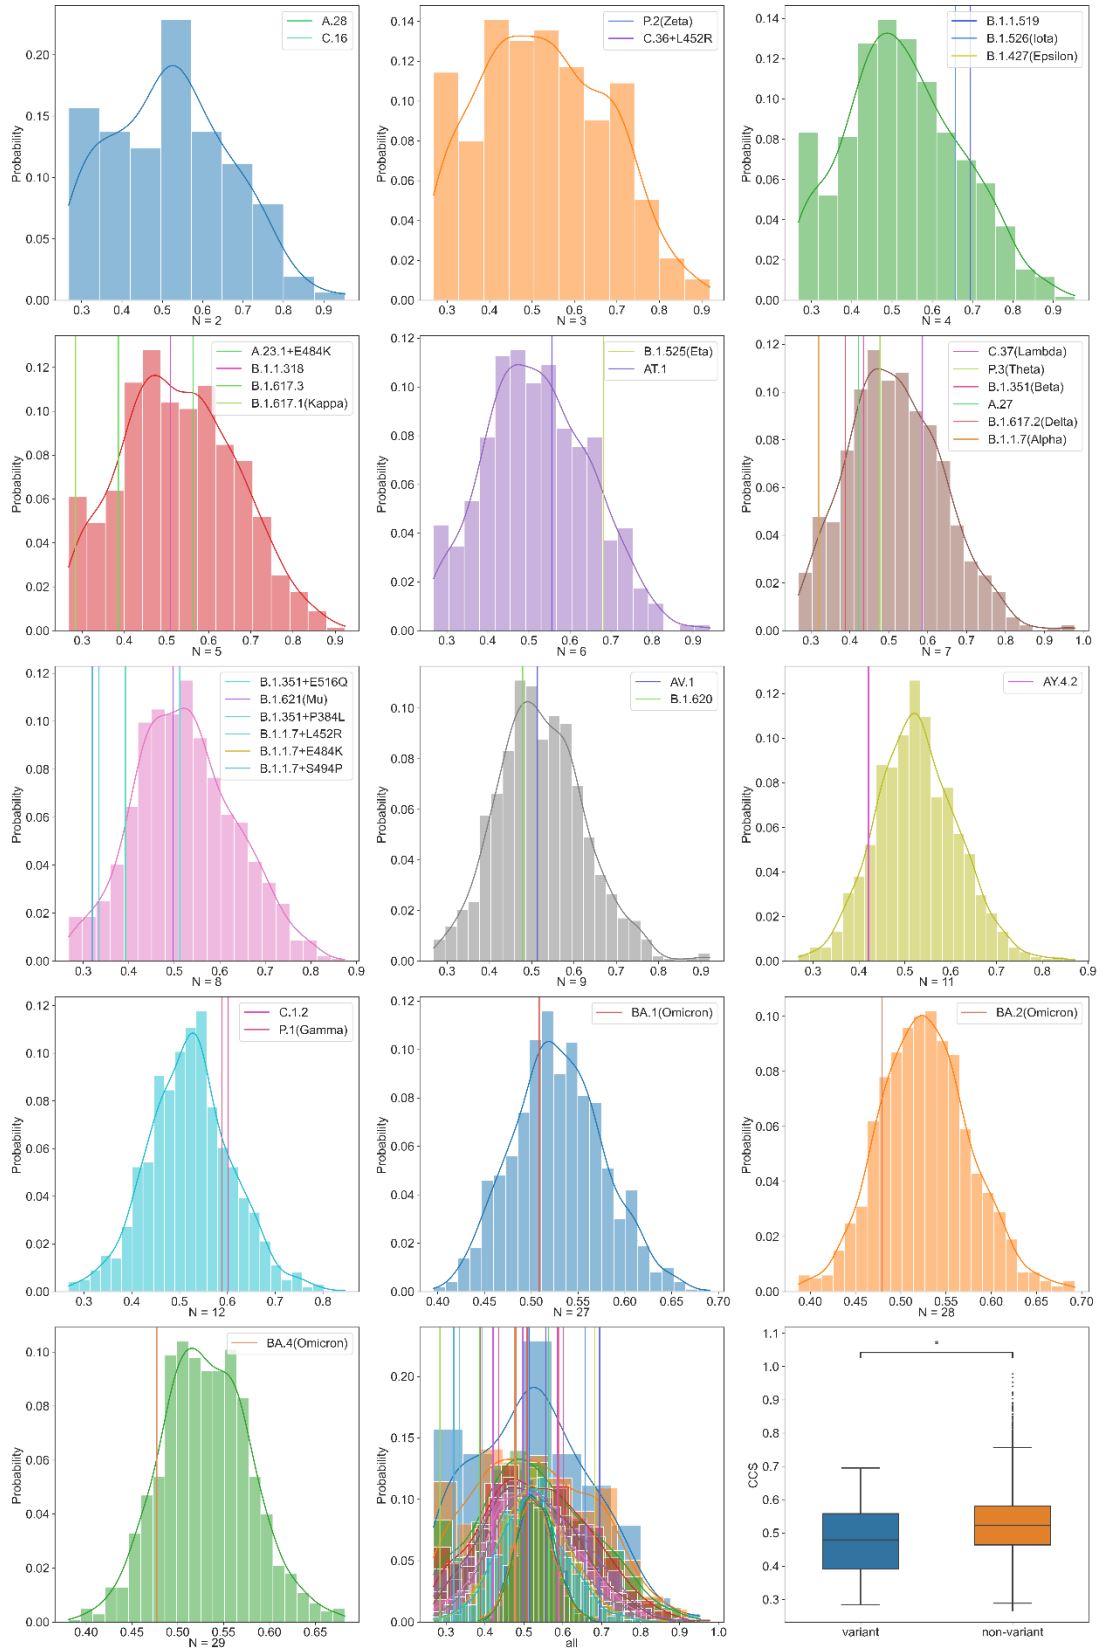

**Figure S2.** The distribution of CCS for the same number of nodes in PCCN.

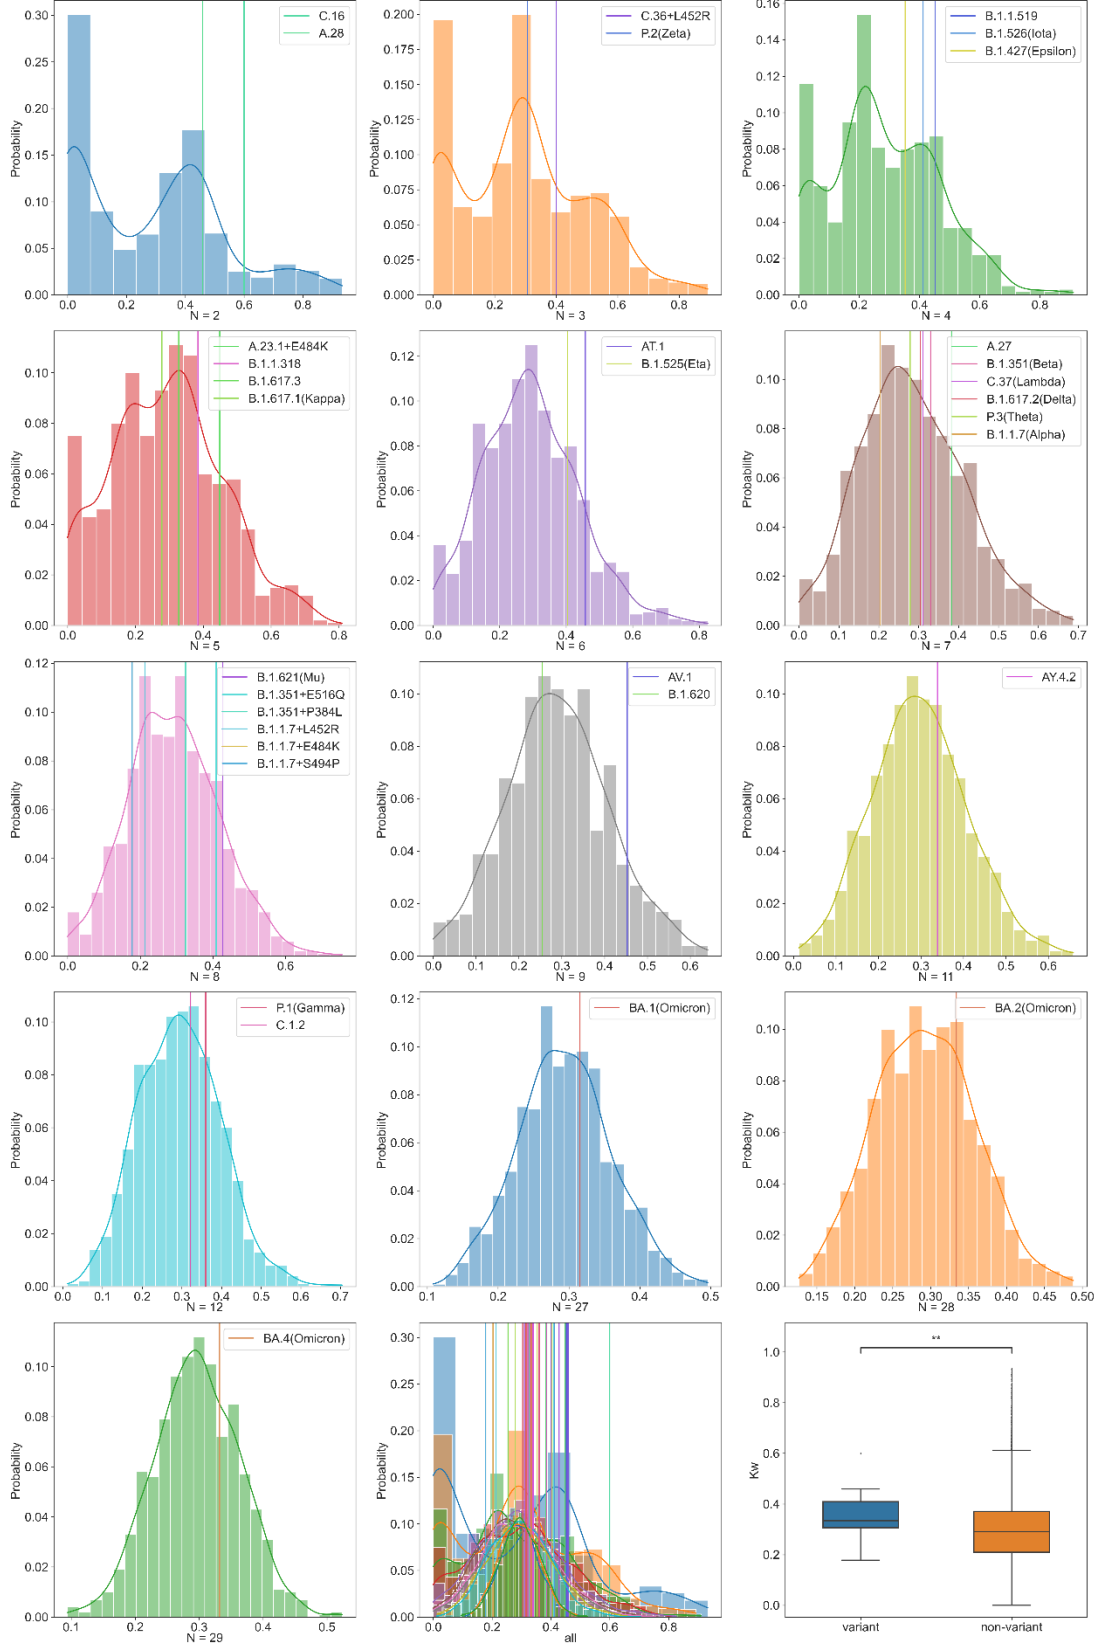

**Figure S3.** The distribution of Kw for the same number of nodes in PCCN.

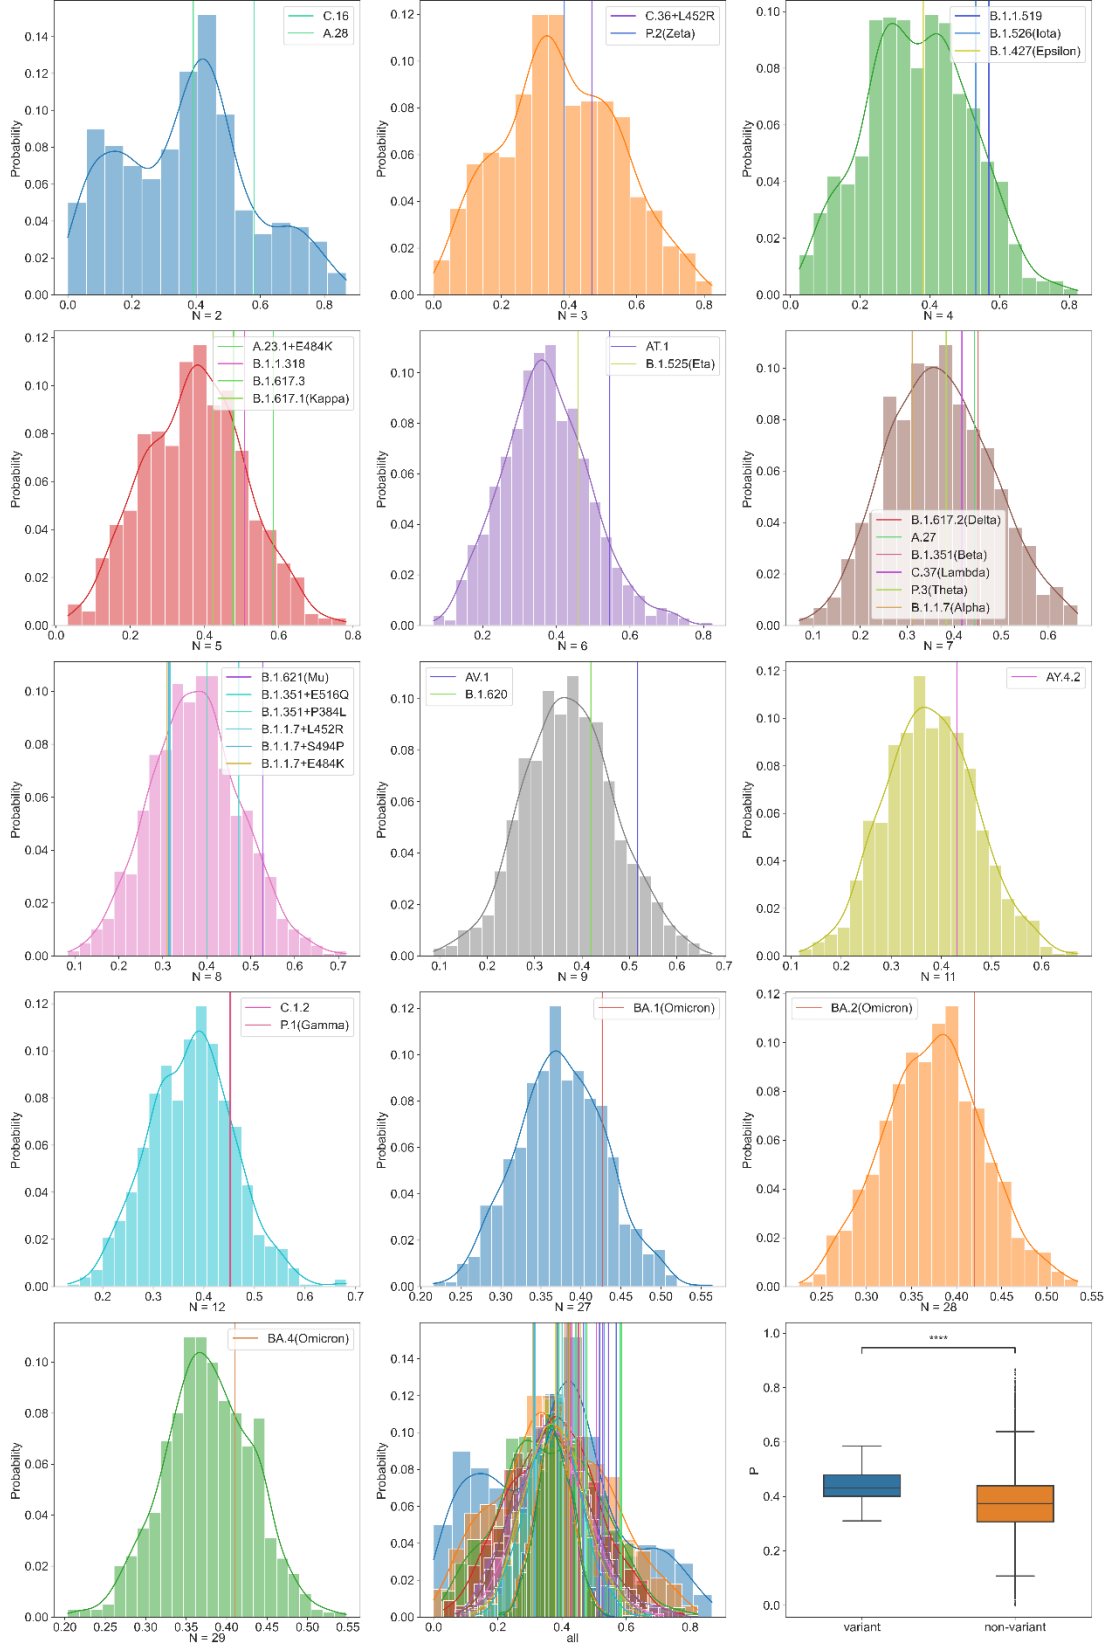

**Figure S4.** The distribution of P for the same number of nodes in PCCN.



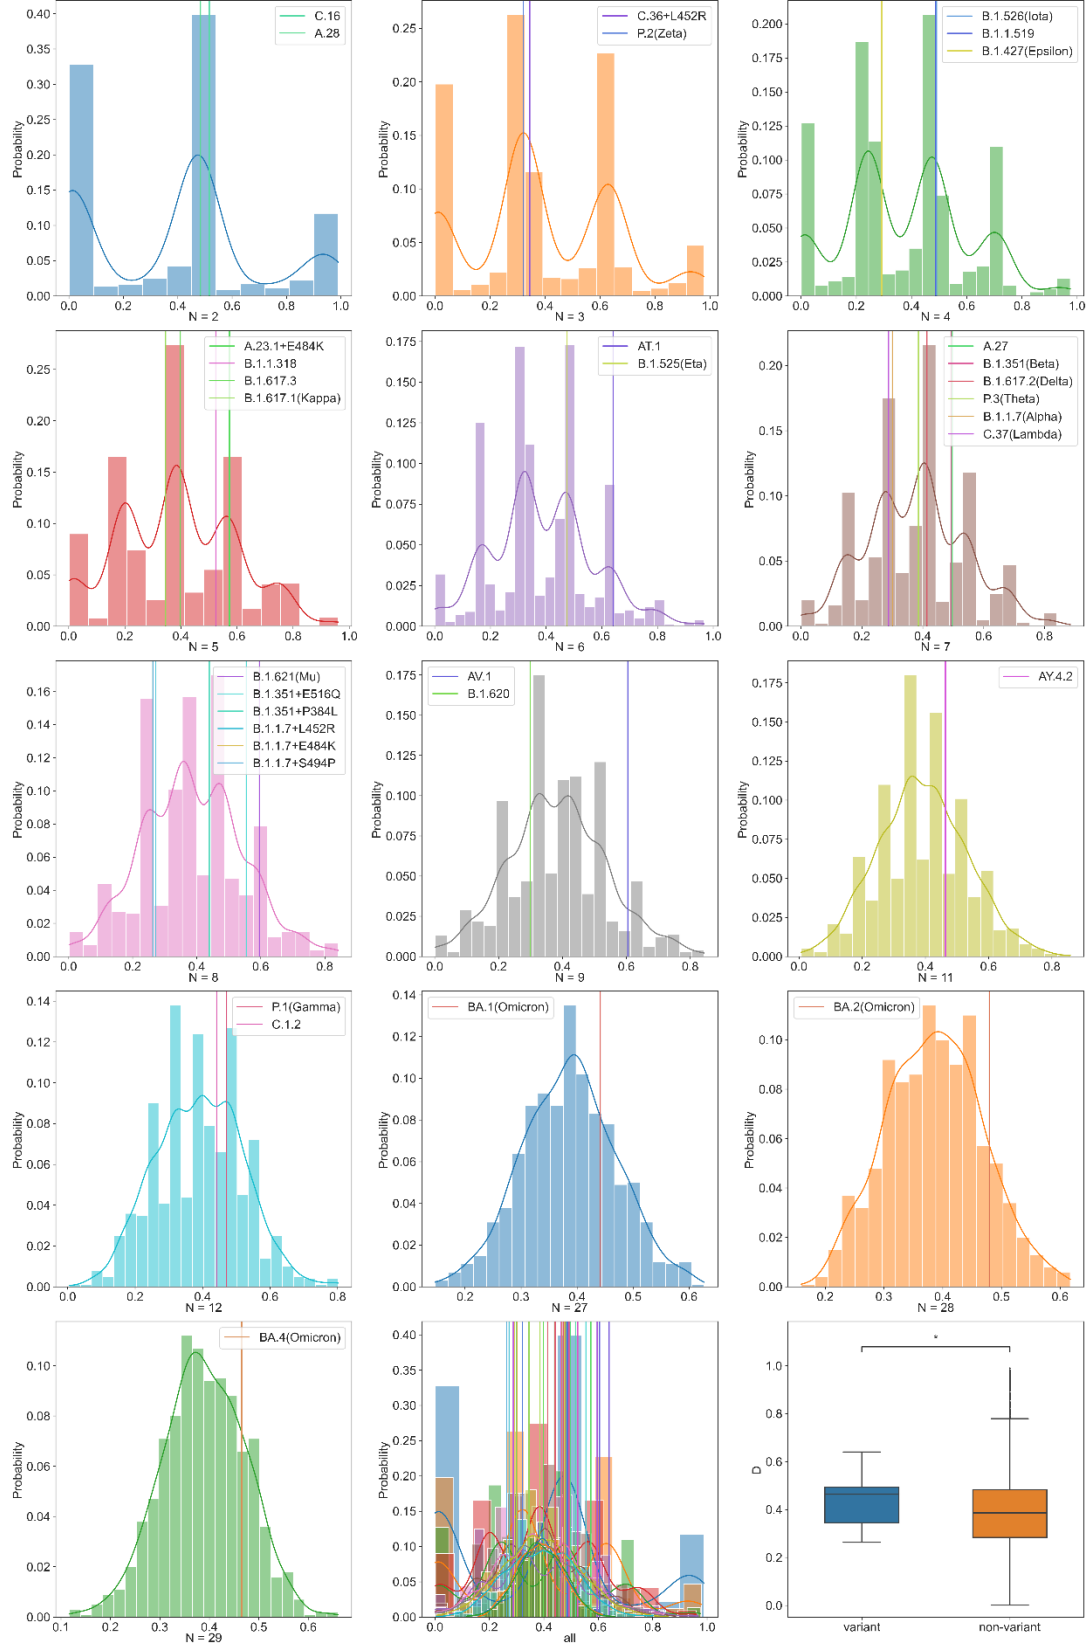

**Figure S5.** The distribution of  $D$  for the same number of nodes in PCCN.

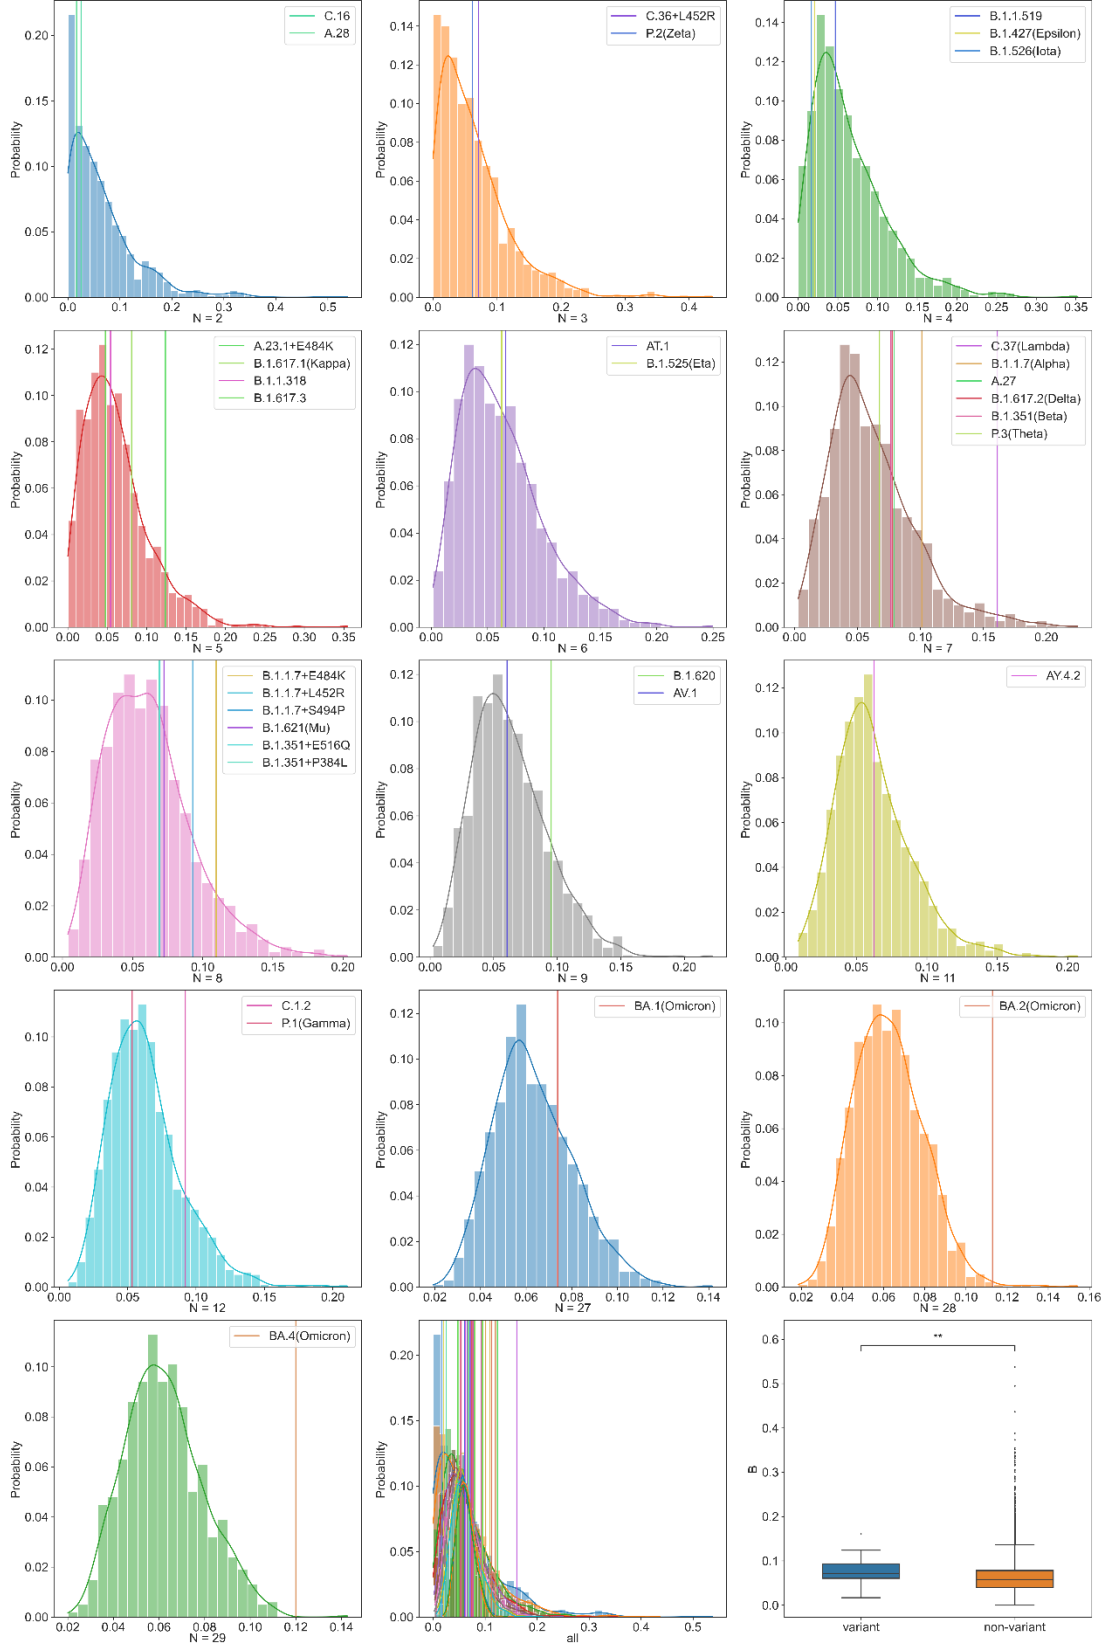

**Figure S6.** The distribution of B for the same number of nodes in PCCN.

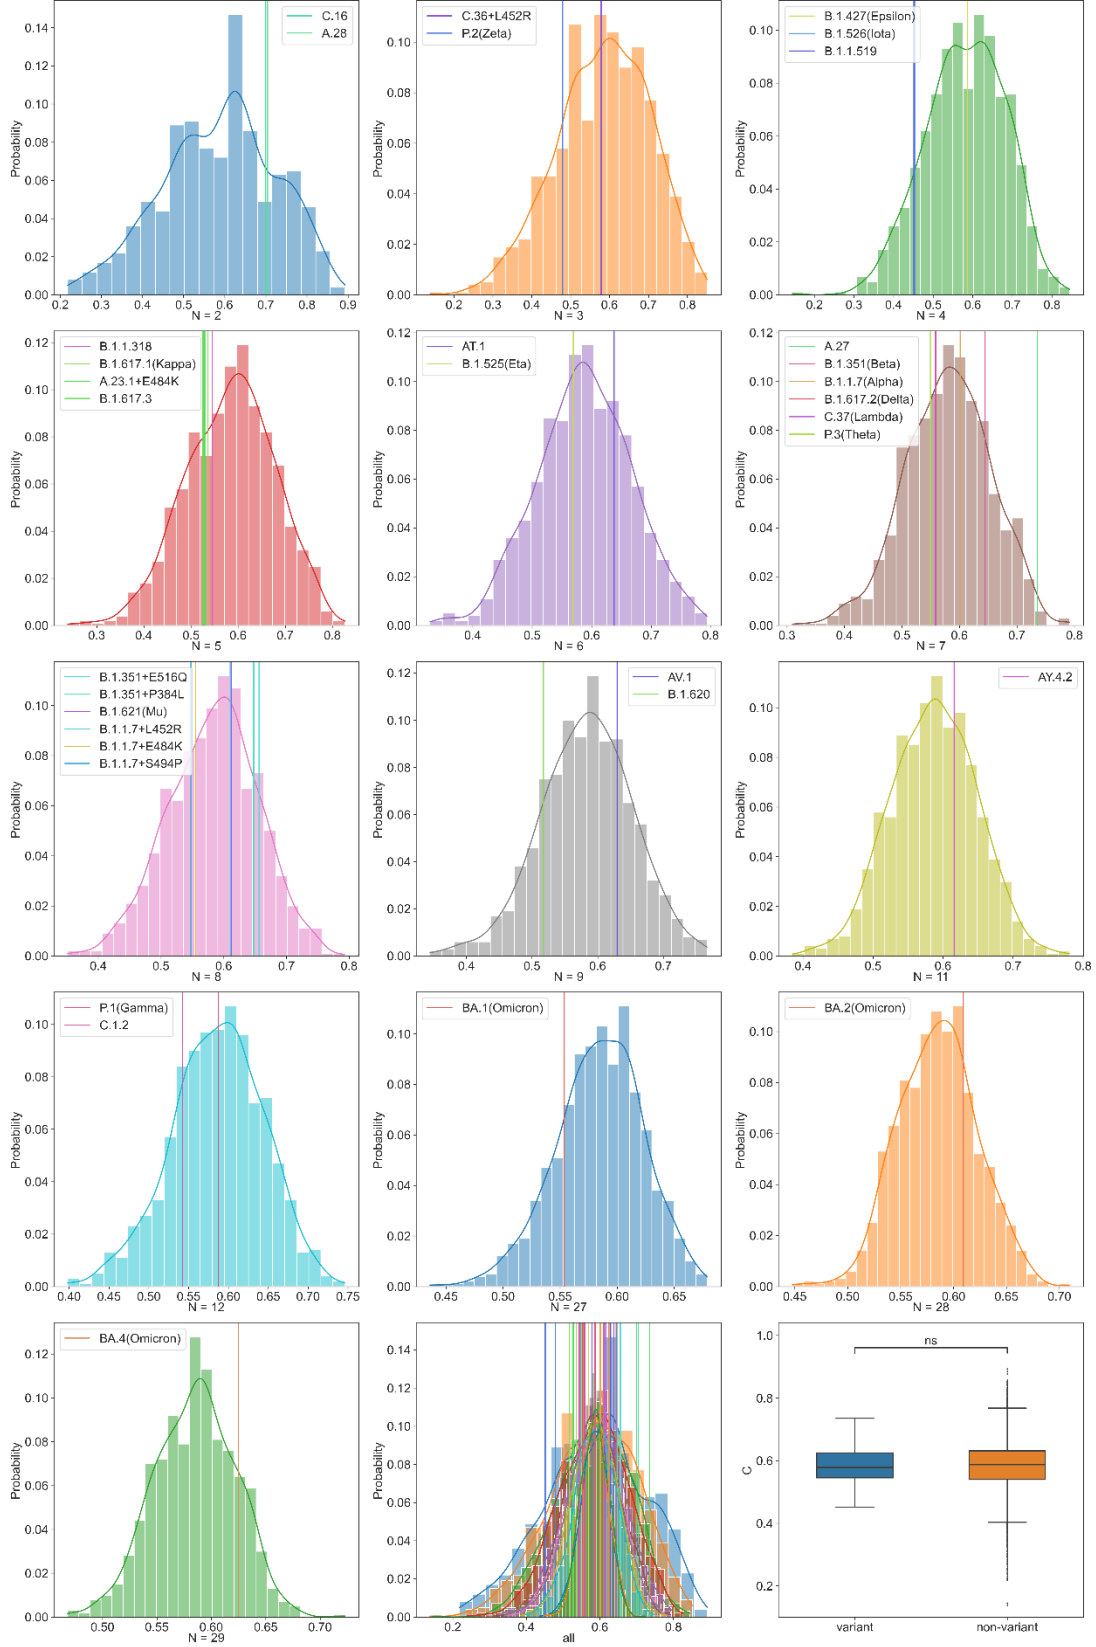

**Figure S7.** The distribution of  $C$  for the same number of nodes in PCCN.

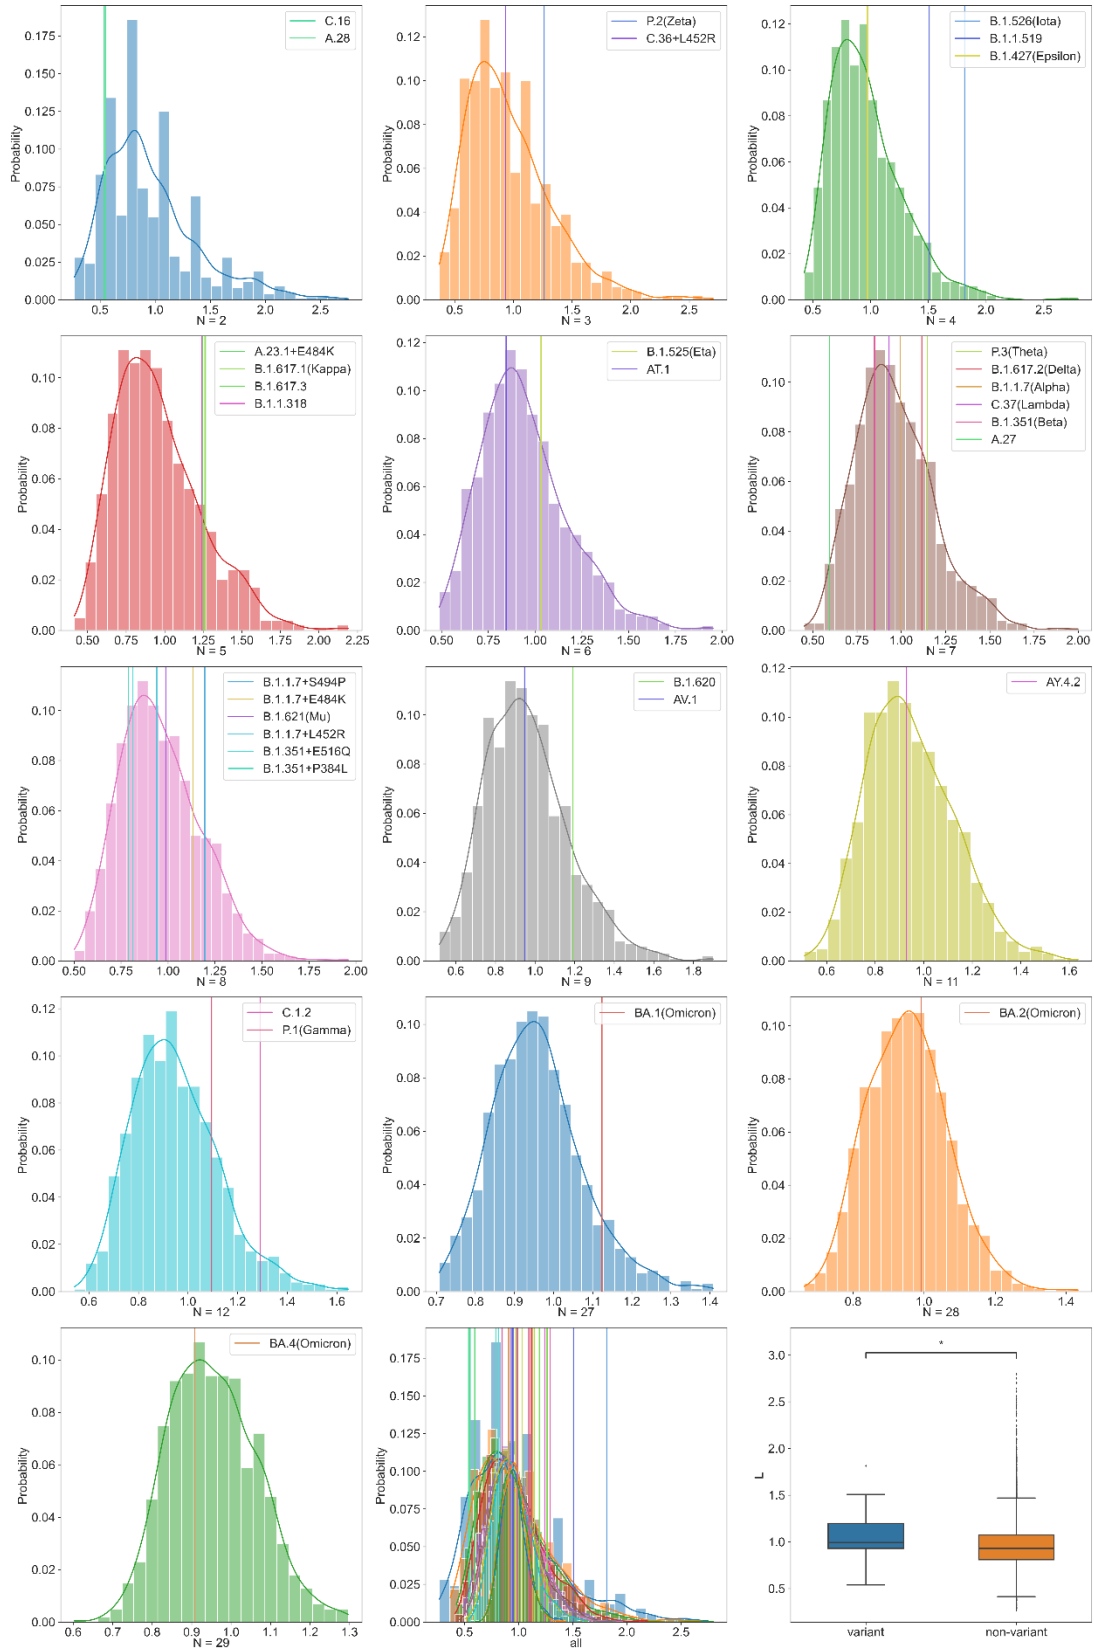

**Figure S8.** The distribution of  $L$  for the same number of nodes in PCCN.
