# Supplementary material for: A Protein Co-Conservation Network Model Characterizes Mutation Effects on SARS-CoV-2 Spike Protein
Source: Int J Mol Sci. 2023 Feb 7;24(4):3255. doi: 10.3390/ijms24043255 (PMC9960056; doi:10.3390/ijms24043255)
Supplement: Supplementary file 1 [file ijms-24-03255-s001.zip › TableS1.xlsx]

## Sheet: Sheet1
Table S1: The network parameters for each nodes in PCCN of spike protein
Position	CS	Kw	P	D	B	C	Mutation Site
1M	0.344344	0	0.0512499	0	0	0.281353
2F	0.356356	0.0326757	0.25418	0.00733945	0.127296	0.417137
3V	0.454955	0	0.171913	0.00183486	0.0102263	0.281925
4F	0.362863	0	0.215007	0.00183486	0.000786636	0.213134
5L	0.443944	0	0.197982	0.00183486	0.049373	0.304509	√
6V	0.355355	0	0.116103	0.00183486	0.107399	0.451616
7L	0.215716	0.147572	0.154312	0.0770642	0.175374	0.699206
8L	0.46046	0	0.0031008	0.00183486	0.000185091	0.543253
9P	0.26026	0.443713	0.609717	0.941284	0.0543705	0.845245	√
10L	0.0930931	0.0543121	0.0628749	0.143119	0.0822729	0.716204
11V	0.0610611	0.120606	0.139708	0.0293578	0.0270233	0.633495
12S	0.261762	0.24242	0.328169	0.649541	0.0885197	0.866821
13S	0.352352	0.21165	0.0804573	0.133945	0.00273009	0.70172	√
14Q	0.0610611	0.454135	0.535946	0.910092	0.00620055	0.830202
15C	0.185185	0.496912	0.591927	0.941284	0.00347045	0.824275
16V	0.179179	0.580041	0.636287	0.943119	0.0539077	0.778087
17N	0.474474	0.0487596	0.0570818	0.012844	0.00453473	0.601302
18L	0.105105	0.295119	0.41001	0.768807	0.113368	0.885009	√
19T	0.0880881	0.438831	0.596699	0.955963	0.00717227	0.849564	√
20T	0.03003	0.56301	0.588469	0.92844	0.00161955	0.78384	√
21R	0.122122	0.206023	0.398178	0.765138	0.141039	0.917799
22T	0.213714	0.164431	0.117097	0.0220183	0.00393318	0.641366
23Q	0.0855856	0.248668	0.349509	0.680734	0.15941	0.87279
24L	0.035035	0.16131	0.0941575	0.159633	0.0219795	0.733205	√
25P	0.244745	0.142406	0.078819	0.102752	0.0248022	0.702374
26P	0.563564	0.0832619	0.407849	0.0752294	0.027995	0.553815	√
27A	0.121121	0.188163	0.175646	0.0275229	0.0106427	0.597039
28Y	0.14965	0	0.00966818	0.00183486	0.000323909	0.502401
29T	0.277778	0.617847	0.689099	0.952294	0.0746379	0.76958
30N	0	0	0.000207743	0.00183486	9.25455e-05	0.580983
31S	0.549049	0.164669	0.327779	0.640367	0.345796	0.889823
32F	0.252753	0.0767452	0.0904103	0.0220183	0.110083	0.64154
33T	0.146647	0.472438	0.570924	0.93578	0.0418305	0.833166
34R	0.331331	0.909595	0.844278	0.990826	0.0223035	0.744029
35G	0.862362	0	5.37456e-05	0.00183486	9.25455e-05	0.501243
36V	0.541542	0.783353	0.766642	0.930275	0.0948591	0.750273
37Y	0.692693	0	0.049652	0.00183486	0.000601546	0.479263
38Y	0.863363	0	0.0496708	0.00183486	0.000971727	0.524109
39P	0.480981	0.467311	0.584347	0.888073	0.0984684	0.834459
40D	0.494995	0.864025	0.757899	0.959633	0.00462727	0.742493
41K	0.33984	0.164183	0.574418	0.0972477	0.0311878	0.654227
42V	0.459459	0.869443	0.764464	0.943119	0.0423743	0.749386
43F	0.407908	0.000927995	0.0470212	0.00733945	0.00328536	0.504749
44R	0.575075	0.938791	0.800843	0.955963	0.0156055	0.723285
45S	0.578078	0.773304	0.684725	0.930275	0.001527	0.747962
46S	0.541041	0.606192	0.606465	0.919266	0.0469205	0.793952
47V	0.361862	0.283202	0.327135	0.0752294	0.011707	0.664232
48L	0.431431	0.780327	0.729903	0.961468	0.0461802	0.740932
49H	0.268769	0.129128	0.182036	0.0220183	0.00587664	0.504394
50S	0.674174	0	0.0132597	0.00183486	0.000323909	0.493865
51T	0.335836	0.693712	0.697603	0.937615	0.0749618	0.765321
52Q	0.457958	0.0749617	0.0713858	0.0183486	0.00800518	0.599289	√
53D	0.497497	0.811358	0.780276	0.955963	0.0653371	0.745498
54L	0.536036	0	0.0495994	0.00183486	0.000786636	0.476604
55F	0.647648	0	0.0495925	0.00183486	0.000138818	0.471927
56L	0.544545	0.870183	0.786321	0.941284	0.0582111	0.73639
57P	0.18018	0.582836	0.630504	0.959633	0.002036	0.794527
58F	0.318819	0.713202	0.69047	0.959633	0.003563	0.777823
59F	0.182683	0.474816	0.566129	0.921101	0.0214243	0.816812
60S	0.644144	0.0403541	0.076012	0.0110092	0.0163805	0.617585
61N	0.347347	0.266047	0.427736	0.822018	0.188191	0.917053
62V	0.223724	0.0738692	0.650055	0.104587	0.238976	0.669002
63T	0.429429	0.835733	0.738964	0.952294	0.00985609	0.748074
64W	0.151151	0.240731	0.339916	0.636697	0.103558	0.858287
65F	0.307307	0	0.000210227	0.00183486	4.62727e-05	0.583248
66H	0.112112	0.456105	0.635731	0.952294	0.0288279	0.841636
67A	0.200701	0.555574	0.596654	0.93211	0.0193883	0.794853	√
68I	0.117618	0.702676	0.728679	0.987156	0.000138818	0.766725
69H	0.292793	0.726734	0.75064	0.93211	0.1918	0.741433
70V	0	0	0.127624	0.00183486	0.129888	0.475057
71S	0	0	0.23311	0.00183486	0.0713988	0.319016
72G	0	0	0.283542	0.00183486	0.0129101	0.216519
73T	0	0	0.299952	0.00183486	0.000277636	0.173387
74N	0	0	0.283562	0.00183486	0.0461339	0.24753
75G	0	0	0.233157	0.00183486	0.104623	0.364797	√
76T	0	0	0.127714	0.00183486	0.163111	0.549364	√
77K	0.0825826	0.337962	0.551681	0.878899	0.227847	0.882486
78R	0.146647	0.274538	0.358895	0.680734	0.0823655	0.863398
79F	0.349349	0.510652	0.537802	0.888073	0.00546018	0.818593
80D	0.227728	0.155879	0.263596	0.543119	0.205034	0.853902	√
81N	0.317317	0.906436	0.778432	0.965138	0.000138818	0.718057
82P	0.247748	0.856656	0.787949	0.972477	0.0281801	0.735745
83V	0.301301	0	2.14245e-06	0.00183486	4.62727e-05	0.484205
84L	0.212212	0.862688	0.779544	0.961468	0.0333164	0.732696
85P	0.229229	0.235671	0.432918	0.849541	0.0642728	0.928494
86F	0.907407	0	0.000217354	0.00183486	0	0.608937
87N	0.0890891	0.213355	0.457076	0.825688	0.177467	0.94157
88D	0.566567	0.186084	0.346245	0.633028	0.161156	0.888788
89G	1	0	0.0828789	0.00183486	0.0398755	0.551874
90V	0.553053	0	0.127511	0.00183486	0.000138818	0.379607
91Y	0.475475	0	0.0827376	0.00183486	0.0189834	0.495894
92F	0.431932	0.645841	0.671616	0.902752	0.0789066	0.781104
93A	0.358358	0.835926	0.72755	0.948624	0.000740364	0.743536
94S	0.390891	0.770856	0.67499	0.921101	0.000647818	0.739861
95T	0.236737	0.729563	0.752757	1	0.000370182	0.760509	√
96E	0.363363	0.951611	0.899053	0.988991	0.0773217	0.742546
97K	0	0	0.0827084	0.00183486	0.0146222	0.475005
98S	0	0	0.127486	0.00183486	4.62727e-05	0.389827
99N	0	0	0.0828481	0.00183486	0.0441442	0.568205
100I	0.286286	0.242128	0.488409	0.820183	0.297626	0.921557
101I	0.273273	0	0.000171823	0.00183486	0	0.587156
102R	0.478979	0.862836	0.776136	0.955963	0.0117995	0.739494
103G	0.524024	0.815275	0.746321	0.948624	0.0303086	0.74106
104W	0.395896	0	0.000546597	0.00183486	0.000138818	0.530513
105I	0.324324	0.160145	0.271392	0.370642	0.256166	0.783872
106F	0.553053	0	0.0970972	0.00183486	0.0669104	0.497571
107G	1	0	0.160134	0.00183486	0.00976355	0.334043
108T	0.724224	0	0.144566	0.00183486	0.00157327	0.297275
109T	0.46997	0.0113279	0.163975	0.00550459	0.0521031	0.436841
110L	0.437938	0	0.0481558	0.00183486	0.017306	0.555116
111D	0.196196	0.382792	0.674566	0.987156	0.113785	0.889123
112S	0.692693	0	0.000247565	0.00183486	0	0.60096
113K	0.351852	0.281103	0.44487	0.792661	0.144417	0.894017
114T	0.582082	0.17736	0.203988	0.0348624	0.0365555	0.631305
115Q	0.463964	0.921667	0.802571	0.968807	0.0126787	0.731646
116S	0.642643	0.134679	0.26864	0.0605505	0.0760724	0.59903
117L	0.439439	0.135964	0.293865	0.0256881	0.0929619	0.573656
118L	0.507007	0	0.069908	0.00183486	0.000971727	0.393281
119I	0.521522	0	0.0582961	0.00183486	0.0204525	0.523835
120V	0.188689	0.465275	0.570813	0.886239	0.0888899	0.831697
121N	0.542042	0.933282	0.784518	0.959633	9.25455e-05	0.735168
122N	0.300801	0.778589	0.746021	0.965138	0.0365092	0.740035
123A	0.186687	0	2.83538e-05	0.00183486	4.62727e-05	0.496155
124T	0.327327	0.798439	0.799241	0.992661	0.023414	0.75044
125N	0.0125125	0.511127	0.654212	0.972477	0.0925917	0.831141
126V	0.237738	0.151836	0.471912	0.0844037	0.0116145	0.663139	√
127V	0.038038	0.324119	0.47408	0.875229	0.18051	0.900422
128I	0.463964	0.142529	0.232076	0.0366972	0.174494	0.644137
129K	0.275275	0.699111	0.670658	0.946789	0.0148535	0.752453
130V	0.363363	0.255608	0.245413	0.341284	0.16214	0.769529
131C	0.665666	0	0.0832145	0.00183486	0.0206376	0.489667
132E	0.264765	0	0.127734	0.00183486	4.62727e-05	0.369738
133F	0.500501	0	0.0829251	0.00183486	0.0381287	0.516302
134Q	0.159159	0.495513	0.719767	0.950459	0.186387	0.819744
135F	0.306807	0	0.0552932	0.00183486	0.00883809	0.516995
136C	0.656657	0	0.0626787	0.00183486	0.00115682	0.412351	√
137N	0.187187	0.109676	0.238202	0.0348624	0.0584887	0.619772
138D	0.171672	0.598743	0.719461	0.977982	0.0426635	0.779295	√
139P	0.779279	0	0.000135857	0.00183486	4.62727e-05	0.576201
140F	0.0885886	0.287585	0.417533	0.777982	0.0553422	0.882872
141L	0.254755	0.840355	0.733566	0.950459	0.00411827	0.734368
142G	0.025025	0.0858384	0.0635579	0.0642202	0.0440516	0.587846	√
143V	0.575576	0	0.00522238	0.00183486	0.000138818	0.419537
144Y	0.123123	0.0363778	0.0497088	0.0458716	0.0602471	0.606739
145Y	0.173674	0.533251	0.636574	0.941284	0.0892601	0.790639	√
146H	0	0	0.0565413	0.00183486	0.0119846	0.503012
147K	0	0	0.0658387	0.00183486	0.000925455	0.399095
148N	0.446947	0.0715329	0.14771	0.0201835	0.0514553	0.596891
149N	0.184184	0.50926	0.737888	0.998165	0.29758	0.835113
150K	0.232733	0	0.127698	0.00183486	0.146546	0.525005
151S	0	0	0.23315	0.00183486	0.088057	0.350001
152W	0	0	0.28356	0.00183486	0.0295683	0.237602	√
153M	0	0	0.299955	0.00183486	0.000277636	0.166477
154E	0	0	0.283552	0.00183486	0.0294757	0.231087
155S	0	0	0.23313	0.00183486	0.0879645	0.340364
156E	0	0	0.127661	0.00183486	0.146453	0.509321	√
157F	0.216717	0.53242	0.668781	0.93211	0.2427	0.805209	√
158R	0.307307	0.0469211	0.20685	0.0422018	0.0165194	0.575567
159V	0.211712	0.886764	0.787631	0.959633	0.0407663	0.725001
160Y	0.208709	0.0503824	0.0943565	0.0110092	0.00666327	0.533434
161S	0.314314	0.235651	0.453693	0.0825688	0.151404	0.704127
162S	0	0	0.0579219	0.00183486	0.00231364	0.459136
163A	0	0	0.0536399	0.00183486	0.00976355	0.491591
164N	0.255756	0.149786	0.190407	0.293578	0.134469	0.767036
165N	0.305806	0.494315	0.57348	0.926606	0.0349359	0.805427
166C	0.244244	0.0464534	0.173331	0.0183486	0.0142983	0.558834
167T	0.27978	0.631701	0.669516	0.961468	0.0235528	0.789606
168F	0.0845846	0.368887	0.383215	0.704587	0.0126787	0.824299
169E	0.32983	0.800228	0.720173	0.948624	0.0136967	0.748047
170Y	0.151151	0.171452	0.316267	0.0440367	0.168618	0.62941
171V	0.168669	0	0.00996599	0.00183486	0.000277636	0.537541
172S	0.123624	0.45065	0.593455	0.943119	0.0576096	0.840267
173Q	0.14965	0.228539	0.304852	0.612844	0.296793	0.858232
174P	0.237237	0.215127	0.287971	0.541284	0.270603	0.841477
175F	0.62012	0	0.000208562	0.00183486	0	0.563315
176L	0.247748	0.65925	0.691382	0.930275	0.0694091	0.75313
177M	0.307307	0	0.00603422	0.00183486	0.00115682	0.520759
178D	0.505005	0.108517	0.522678	0.119266	0.279395	0.644436
179L	0.402903	0.248243	0.155109	0.0256881	0.00592291	0.553978
180E	0.219219	0.181045	0.146803	0.0293578	0.00245245	0.593093
181G	0.333333	0.437226	0.533461	0.897248	0.0457175	0.850377
182K	0.24024	0.625359	0.634655	0.955963	0.00467355	0.762611
183Q	0.026026	0.358729	0.585707	0.933945	0.460784	0.891165
184G	0	0	0.132061	0.00183486	0.39975	0.555319
185N	0	0	0.243432	0.00183486	0.341632	0.369324
186F	0	0	0.304893	0.00183486	0.283513	0.25118
187K	0	0	0.339864	0.00183486	0.225394	0.169487
188N	0	0	0.358187	0.00183486	0.167276	0.10963
189L	0	0	0.368827	0.00183486	0.109157	0.0638866
190R	0	0	0.373166	0.00183486	0.0510388	0.0277909	√
191E	0	0	0.375108	0.00183486	0.00129564	0
192F	0	0	0.373165	0.00183486	0.009671	0.0151927
193V	0	0	0.368826	0.00183486	0.0677896	0.0482188
194F	0	0	0.358182	0.00183486	0.125908	0.0896173
195K	0	0	0.339857	0.00183486	0.184027	0.143034
196N	0	0	0.30488	0.00183486	0.242145	0.214591
197I	0	0	0.243409	0.00183486	0.300264	0.315418
198D	0	0	0.132019	0.00183486	0.358382	0.468094
199G	0.464965	0.914183	0.917071	0.965138	0.47337	0.726453
200Y	0.425425	0	0.0497226	0.00183486	0.000509	0.466619
201F	0.631131	0	0.0497665	0.00183486	0.00171209	0.545893
202K	0.22973	0.356324	0.565239	0.869725	0.136551	0.874163
203I	0.412913	0	0.0258886	0.00183486	0.00231364	0.54988
204Y	0.806306	0.00223838	0.0868863	0.00733945	0.009671	0.527107
205S	0.391892	0.254622	0.252384	0.455046	0.127666	0.799874
206K	0.0705706	0.290314	0.456146	0.838532	0.0840313	0.906232
207H	0.285786	0.862369	0.770889	0.974312	0.000786636	0.741671
208T	0.317317	0.484062	0.587554	0.926606	0.0291518	0.833508
209P	0.295796	0.368275	0.49314	0.856881	0.0923141	0.872354
210I	0.330831	0	0.000102963	0.00183486	0	0.571942
211N	0.213213	0.587808	0.698651	0.977982	0.0219795	0.780278	√
212L	0.285285	0.696465	0.66786	0.926606	0.0466892	0.767472
213V	0.210711	0.0270797	0.0471621	0.00733945	0.00120309	0.523503	√
214R	0.203704	0.723897	0.697847	0.950459	0.0197585	0.745487
215D	0.184685	0.533764	0.765499	0.985321	0.125723	0.809458	√
216L	0	0	0.0828101	0.00183486	0.0313266	0.510845
217P	0	0	0.127483	0.00183486	4.62727e-05	0.363198
218Q	0	0	0.0827408	0.00183486	0.0274397	0.504641
219G	0.246246	0.606741	0.725672	0.976147	0.0980056	0.797707
220F	0.292292	0.802832	0.718101	0.955963	0.000185091	0.736963
221S	0.139139	0.237059	0.356007	0.733945	0.0506224	0.895707
222A	0.191191	0.250033	0.127079	0.194495	0.0103188	0.721122	√
223L	0.503003	0.725064	0.660408	0.921101	0.0108741	0.769167
224E	0.412412	0.0990869	0.22912	0.111927	0.263246	0.653727
225P	0.398899	0.905346	0.813931	0.966972	0.0528897	0.730957
226L	0.431932	0	0.0113438	0.00183486	0.000740364	0.48861
227V	0.443443	0.0413766	0.273038	0.040367	0.0187867	0.538047
228D	0.311311	0.731552	0.738849	0.959633	0.0806534	0.764369
229L	0.561562	0	6.72925e-05	0.00183486	0	0.519031
230P	0.584084	0.707608	0.706142	0.913761	0.0842164	0.764143
231I	0.436937	0	0.0146979	0.00183486	0.00124936	0.507564
232G	0.77978	0.0281426	0.360062	0.040367	0.0371107	0.542702
233I	0.222723	0.678864	0.701627	0.972477	0.0552496	0.788605
234N	0.291291	0.708159	0.674159	0.921101	0.0119384	0.743922
235I	0.628629	0	6.54179e-05	0.00183486	0	0.561408
236T	0.437938	0.368084	0.511941	0.882569	0.0739901	0.873064
237R	0.164665	0.299683	0.474784	0.869725	0.0710749	0.899899
238F	0.520521	0	7.24158e-05	0.00183486	0	0.576241
239Q	0.255255	0.908803	0.828052	0.977982	0.0115219	0.731711
240T	0.462462	0.289355	0.343389	0.611009	0.0969876	0.831737
241L	0.253253	0	0.00012651	0.00183486	0	0.553824
242L	0.385886	0.899985	0.798521	0.961468	0.0245245	0.738105
243A	0.142643	0.928038	0.830369	0.988991	0.00467355	0.746346
244L	0.105105	0.188913	0.349946	0.0825688	0.0898154	0.70879
245H	0.327327	0	0.0216082	0.00183486	0.011198	0.465796	√
246R	0.261261	0.073132	0.235598	0.0238532	0.378048	0.520428	√
247S	0	0	0.153062	0.00183486	0.306788	0.347998
248Y	0	0	0.255159	0.00183486	0.24867	0.236793
249L	0	0	0.311265	0.00183486	0.190551	0.159121
250T	0	0	0.343159	0.00183486	0.132433	0.1018
251P	0	0	0.359237	0.00183486	0.074314	0.05776
252G	0	0	0.368063	0.00183486	0.0167507	0.0228992
253D	0	0	0.369734	0.00183486	0.00189718	0.0104524	√
254S	0	0	0.367832	0.00183486	0.0445606	0.0377922
255S	0	0	0.358728	0.00183486	0.102633	0.0764507
256S	0	0	0.342107	0.00183486	0.160751	0.125885
257G	0	0	0.309383	0.00183486	0.21887	0.191322
258W	0	0	0.251665	0.00183486	0.276989	0.282035
259T	0	0	0.146807	0.00183486	0.335107	0.416172
260A	0.142142	0.127394	0.246615	0.0330275	0.40521	0.634726
261G	0.0805806	0.339885	0.546265	0.943119	0.345148	0.906033
262A	0.123123	0.178645	0.204203	0.0495413	0.0165194	0.644326
263A	0.361361	0.543396	0.592404	0.93578	0.00495118	0.798391
264A	0.397898	0.464629	0.602922	0.921101	0.111471	0.840151
265Y	0.718719	0	0.0827268	0.00183486	0.0446995	0.526935
266Y	0.38038	0	0.127443	0.00183486	4.62727e-05	0.364391
267V	0.8003	0	0.0827294	0.00183486	0.0140669	0.477947
268G	0.436436	0.939477	0.952069	0.990826	0.132803	0.747829
269Y	0	0	0.0496706	0.00183486	0.00171209	0.477899
270L	0.929429	0	0.0496551	0.00183486	0.000323909	0.512197
271Q	0.22973	0.515216	0.625541	0.93945	0.0602008	0.809046
272P	0.141141	0.12451	0.318665	0.737615	0.989392	0.955179
273R	0.211712	0.548739	0.606642	0.952294	0.00124936	0.786535
274T	0.512513	0.77162	0.760447	0.946789	0.0688538	0.7388
275F	0.495996	0	0.0827061	0.00183486	0.00939336	0.472915
276L	0.653153	0	0.127474	0.00183486	4.62727e-05	0.392471
277L	0.713213	0	0.0828223	0.00183486	0.049373	0.58742
278K	0.105606	0.239689	0.555593	0.946789	0.346398	0.96066
279Y	0.660661	0	0.000879475	0.00183486	0.000138818	0.596846
280N	0.527027	0.239514	0.11405	0.155963	0.00906946	0.695762
281E	0.314815	0.323819	0.491737	0.946789	0.0383601	0.90425
282N	0.371371	0.570509	0.619498	0.926606	0.044283	0.78105
283G	0.987487	0	4.20641e-05	0.00183486	4.62727e-05	0.508153
284T	0.353854	0.88312	0.812995	0.955963	0.0495118	0.73788
285I	0.835335	0	0.00069796	0.00183486	4.62727e-05	0.507133
286T	0.343844	0.139347	0.130236	0.198165	0.0940262	0.746451
287D	0.275275	0.71102	0.760405	0.968807	0.11707	0.754997
288A	0.862863	0	0.103656	0.00183486	0.0577021	0.481978
289V	0.718719	0	0.176288	0.00183486	0.000555273	0.32369
290D	0.94995	0	0.17631	0.00183486	0.00157327	0.360769
291C	0.987487	0	0.103729	0.00183486	0.0597381	0.543115
292A	0.333333	0.412557	0.625993	0.93945	0.294295	0.871278
293L	0.33984	0.0608777	0.319602	0.0605505	0.0477535	0.608553
294D	0.479479	0.136491	0.0712575	0.122936	0.0290593	0.724289
295P	0.31982	0.924155	0.870113	0.994495	0.0200361	0.748718
296L	0.345345	0	5.32063e-05	0.00183486	0.000138818	0.525691
297S	0.487988	0.544088	0.627852	0.93945	0.153348	0.80092
298E	0.822322	0.037954	0.448181	0.0477064	0.0846328	0.555512
299T	0.638639	0	0.101822	0.00183486	0.00703346	0.368554
300K	0.583083	0	0.137494	0.00183486	0.001018	0.368933
301C	1	0	0.0871248	0.00183486	0.0527046	0.539215
302T	0.352853	0.421027	0.656654	0.906422	0.284207	0.863313
303L	0.306807	0.586651	0.583587	0.906422	0.00277636	0.786987
304K	0.286286	0.630094	0.739929	0.976147	0.0581648	0.786293
305S	0.621121	0	0.0498352	0.00183486	0.000185091	0.499224
306F	0.514014	0	0.0500562	0.00183486	0.00208227	0.503302
307T	0.121121	0.203519	0.266352	0.405505	0.148258	0.795307
308V	0.418418	0.767751	0.680015	0.926606	0.000771212	0.745738
309E	0.248248	0.298426	0.419731	0.833028	0.0689926	0.900885
310K	0.473473	0.920036	0.847818	0.966972	0.0812086	0.732642
311G	1	0	0.0826606	0.00183486	0.0220258	0.469692
312I	0.653654	0	0.127392	0.00183486	0.000185091	0.334567
313Y	1	0	0.0826771	0.00183486	0.0368794	0.485587
314Q	0.330831	0.740375	0.749899	0.946789	0.109204	0.7619
315T	0.512513	0.870496	0.771618	0.948624	0.0266068	0.731953
316S	0.695195	0	2.71215e-05	0.00183486	9.25455e-05	0.492886
317N	0.433433	0.785479	0.763451	0.950459	0.0714451	0.741311
318F	0.666166	0	3.18649e-05	0.00183486	9.25455e-05	0.492551
319R	0.507508	0.895721	0.803296	0.961468	0.0242006	0.729645
320V	0.771271	0.181833	0.598298	0.104587	0.0522419	0.69026
321Q	0.241241	0.200288	0.26567	0.482569	0.295521	0.837384
322P	0.810811	0	0.0002662	0.00183486	0	0.587997
323T	0.231231	0.407402	0.550631	0.924771	0.0349359	0.857186
324E	0.27978	0.157109	0.0945715	0.13945	0.0491416	0.728209
325S	0.232232	0.128707	0.362761	0.040367	0.1136	0.588019
326I	0.787788	0	0.0697802	0.00183486	0.00286891	0.389856
327V	0.363363	0	0.0667599	0.00183486	0.00314655	0.380701
328R	0.705706	0.168114	0.612859	0.0917431	0.0807459	0.572794
329F	0.395395	0.943283	0.862994	0.987156	0.0881033	0.745699
330P	0	0	2.1766e-05	0.00183486	0.000138818	0.500098
331N	0.386386	0.687786	0.685599	0.946789	0.0331775	0.746163
332I	0.349349	0.81465	0.724435	0.957798	9.25455e-05	0.732638
333T	0.413914	0.822768	0.732027	0.961468	0.002036	0.72995
334N	0.327327	0.88286	0.815309	0.966972	0.0583962	0.719311
335L	0	0	0.0496099	0.00183486	0.000323909	0.462706
336C	0.872873	0	0.0496428	0.00183486	0.000740364	0.494773
337P	0.374374	0.606973	0.706684	0.955963	0.0854657	0.779146
338F	0.532032	0	0.000159321	0.00183486	9.25455e-05	0.593408
339G	0.248248	0.272558	0.42762	0.779817	0.117116	0.893741	√
340E	0.166166	0.166846	0.312636	0.407339	0.612836	0.819209
341V	0.398899	0	0.0580865	0.00183486	0.0195271	0.517169
342F	0.58959	0	0.0682779	0.00183486	0.00115682	0.425784
343N	0.543043	0.102192	0.247558	0.0256881	0.25612	0.621951
344A	0.394394	0.33598	0.481863	0.809174	0.314978	0.886112
345T	0	0	0.000148187	0.00183486	0	0.57513
346R	0.126627	0.655355	0.702357	0.93578	0.0873166	0.765362	√
347F	0.467467	0.00204926	0.0804346	0.00366972	0.0338716	0.515344
348A	0.897898	0	0.100255	0.00183486	0.000462727	0.353181
349S	0.629129	0	0.0711759	0.00183486	0.0255888	0.479625
350V	0.582082	0.756587	0.763037	0.92844	0.121281	0.750225
351Y	0.496496	0	7.57812e-05	0.00183486	0.000231364	0.497764
352A	0.482482	0.906376	0.831841	0.961468	0.0713526	0.726486
353W	0.807307	0	0.00885814	0.00183486	0.000601546	0.495882
354N	0.632132	0.149051	0.617209	0.0917431	0.041229	0.548289
355R	1	0	0.0161259	0.00183486	0.00115682	0.458004
356K	0.35035	0.232916	0.352004	0.0605505	0.0613114	0.652166
357R	0.226727	0.827429	0.821591	0.976147	0.115404	0.760071
358I	0.577077	0	0.0594373	0.00183486	0.0472445	0.485646
359S	0.593594	0	0.0726448	0.00183486	0.000555273	0.339108
360N	0.694194	0.104479	0.299536	0.0238532	0.0227199	0.45928
361C	1	0	0.0188686	0.00183486	0.00194345	0.479275
362V	0.514014	0.903231	0.803083	0.955963	0.0577021	0.738716
363A	0.526026	0.897035	0.761018	0.952294	0.000185091	0.745735
364D	0.658659	0.790952	0.722436	0.930275	0.0506686	0.745611
365Y	0.411411	0	0.00632713	0.00183486	0.000231364	0.49119
366S	0.57007	0.259196	0.322075	0.0623853	0.0386377	0.65665
367V	0.395896	0.813285	0.804197	0.970642	0.0991162	0.747981	√
368L	0.808308	0	0.0661702	0.00183486	0.0327611	0.478288
369Y	0.399399	0	0.0885111	0.00183486	0.000370182	0.335651
370N	0.488488	0.017377	0.127263	0.00733945	0.026977	0.486336
371S	0.293293	0.817149	0.743681	0.941284	0.0689926	0.742623	√
372A	0.295796	0.874536	0.775561	0.950459	0.0229513	0.735096
373S	0.236236	0	1.05762e-05	0.00183486	4.62727e-05	0.504671	√
374F	0.429429	0.721319	0.676967	0.913761	0.0377123	0.751205
375S	0.377377	0.784861	0.701908	0.946789	0	0.727825	√
376T	0.419419	0.948222	0.855601	0.981651	0.0114756	0.739232	√
377F	0.780781	0	7.3167e-05	0.00183486	0	0.552628
378K	0.282783	0.393927	0.576686	0.944954	0.111286	0.862442
379C	1	0	6.59135e-05	0.00183486	9.25455e-05	0.54491
380Y	0.436436	0.859582	0.774791	0.957798	0.007635	0.731583
381G	0.534535	0.808658	0.733545	0.937615	0.0277636	0.731648
382V	0.566066	0	1.51065e-05	0.00183486	4.62727e-05	0.491103
383S	0.604104	0.75785	0.708438	0.926606	0.0336865	0.745808
384P	0.640641	0.285754	0.283845	0.0642202	0.014761	0.668126	√
385T	0.328328	0.160875	0.139723	0.0275229	0.0360002	0.663219
386K	0.686687	0.00475461	0.0800904	0.00550459	0.00532136	0.462082
387L	0.573574	0	0.0308878	0.00183486	0.00920827	0.561659
388N	0.292292	0.311276	0.506779	0.858716	0.0869002	0.901952
389D	0.401902	0.868649	0.808496	0.972477	0.0980056	0.74168
390L	0.409409	0.00972685	0.110973	0.00550459	0.0551571	0.491293
391C	1	0	0.10109	0.00183486	0.00208227	0.334881
392F	0.758759	0	0.0835228	0.00183486	0.00823655	0.425875
393T	0.482983	0.11197	0.258669	0.0330275	0.135301	0.650686
394N	0.513514	0	0.0642725	0.00183486	0.000694091	0.427592
395V	0.542543	0	0.0558767	0.00183486	0.00397945	0.501893
396Y	0.427928	0.549168	0.633828	0.926606	0.0655222	0.791061
397A	0.422422	0.894059	0.782945	0.948624	0.0219333	0.733067
398D	1	0	0.000109247	0.00183486	0	0.509849
399S	0.240741	0.627502	0.806469	0.990826	0.0769978	0.769239
400F	0.931431	0	0.00012927	0.00183486	0.000185091	0.510719
401V	0.340841	0.903303	0.836326	0.970642	0.0554347	0.738704
402I	0.447447	0	1.79899e-05	0.00183486	9.25455e-05	0.474487
403R	0.336336	0.903756	0.805091	0.966972	0.0228125	0.731089
404G	0.0980981	0.222938	0.419284	0.875229	0.161307	0.950917
405D	0.323824	0.15756	0.314253	0.60367	1	0.897385	√
406E	0.26977	0.928713	0.822122	0.983486	0.00402573	0.747988
407V	0.316316	0.695477	0.649655	0.93211	0.00106427	0.750935
408R	0.353854	0.905827	0.81179	0.985321	0.000879182	0.746094	√
409Q	0.432432	0.86727	0.780133	0.959633	0.0315117	0.726115
410I	0.434434	0	0	0.00183486	4.62727e-05	0.478521
411A	0.446947	0.878178	0.787283	0.961468	0.0279025	0.729919
412P	0.373874	0.777813	0.731712	0.941284	0.0577484	0.73973
413G	0.816817	0	0.019748	0.00183486	0.000509	0.477593
414Q	0.242242	0.0230911	0.104464	0.0110092	0.004072	0.531605
415T	0.34985	0.535425	0.650252	0.930275	0.137846	0.811535
416G	0.844344	0	0.0250853	0.00183486	0.0112905	0.520939
417K	0.214214	0.00768925	0.114248	0.00917431	0.00906946	0.447651	√
418I	0.584585	0	0.0250253	0.00183486	0.000925455	0.476
419A	0.40991	0.87778	0.788486	0.952294	0.0559437	0.724814
420D	0.274274	0.761348	0.784987	0.965138	0.148443	0.767531
421Y	0.536036	0	0.10644	0.00183486	0.0822266	0.488945
422N	1	0	0.182795	0.00183486	0.0257276	0.330167
423Y	1	0	0.188697	0.00183486	0.00226736	0.244144
424K	0.628629	0	0.12621	0.00183486	0.0353061	0.349243
425L	0.532533	0.0306767	0.369677	0.0348624	0.101661	0.524068
426P	0.583083	0.831225	0.74709	0.954128	0.111517	0.749938
427D	0.382883	0.870829	0.792987	0.983486	0.00111055	0.75336
428D	0.338338	0.752625	0.696913	0.959633	0.00310027	0.746312
429F	0.467467	0.75459	0.686735	0.944954	0.000185091	0.737072
430T	0.331331	0.227331	0.195969	0.379817	0.0777151	0.783646
431G	0.546547	0.89973	0.794912	0.957798	0.0161492	0.714223
432C	1	0	2.14095e-05	0.00183486	9.25455e-05	0.472169
433V	0.479479	0.855056	0.803588	0.959633	0.0640877	0.728423
434I	0.543043	0	3.99959e-05	0.00183486	0.000185091	0.492214
435A	0.395395	0.767629	0.735036	0.943119	0.0920827	0.753726
436W	0.476476	0.0205196	0.219141	0.0238532	0.0126325	0.512295
437N	0.473473	0.0113745	0.0299619	0.00550459	0.00527509	0.538858
438S	0.399399	0.850563	0.753861	0.948624	0.0418768	0.741958
439N	0.259259	0.391007	0.52717	0.930275	0.0168895	0.868367	√
440N	0.210711	0.149172	0.331862	0.741284	0.382005	0.944299	√
441L	0.122623	0.152126	0.303585	0.631193	0.61006	0.901844
442D	0.472472	1	0.828705	0.968807	0.000138818	0.729307
443S	0.305806	0.406271	0.489372	0.877064	0.0309102	0.848872
444K	0.374374	0.213577	0.179007	0.13211	0.183842	0.700619
445V	0	0	0.125755	0.00183486	0.116422	0.45245
446G	0	0	0.224208	0.00183486	0.0579335	0.304654
447G	0	0	0.266094	0.00183486	0.000879182	0.206755
448N	0	0	0.265804	0.00183486	0.00171209	0.220654
449Y	0	0	0.223266	0.00183486	0.0595993	0.324919	√
450N	0.436937	0	0.123813	0.00183486	0.118088	0.484574
451Y	0.541542	0.692567	0.718525	0.910092	0.179399	0.759138
452L	0.163163	0.281022	0.35571	0.0733945	0.0350285	0.67166	√
453Y	0.40991	0	0.00568884	0.00183486	4.62727e-05	0.484172
454R	0.407407	0.822323	0.772558	0.954128	0.0547406	0.734603
455L	0.174174	0.0993871	0.220673	0.0293578	0.0190181	0.653908
456F	0	0.147721	0.398886	0.87156	0.459349	1
457R	0.282783	0.672318	0.639251	0.93211	0.00481236	0.761882
458K	0.122122	0.353454	0.467556	0.875229	0.0423858	0.877437
459S	0.214214	0.160291	0.0783767	0.146789	0.00948591	0.708162
460N	0.171171	0.633669	0.645329	0.926606	0.0422007	0.766961
461L	0.369369	0	5.07364e-05	0.00183486	9.25455e-05	0.500363
462K	0.228729	0.872539	0.844737	0.972477	0.077877	0.730362
463P	0.868869	0	0.0496304	0.00183486	0.000416455	0.46914
464F	0.474474	0	0.0496404	0.00183486	0.00124936	0.494124
465E	0.264264	0.65945	0.73963	0.974312	0.0638564	0.777431
466R	0.281782	0.471225	0.529748	0.900917	0.024432	0.82511
467D	0.400901	0.114914	0.383456	0.275229	0.355004	0.724837
468I	0.0730731	0.498415	0.577691	0.93578	0.121605	0.813536
469S	0.474975	0.190632	0.146586	0.0183486	0.124335	0.584266
470T	0	0	0.124608	0.00183486	0.0649669	0.385394
471E	0	0	0.19627	0.00183486	0.00717227	0.261902
472I	0	0	0.201881	0.00183486	0.000925455	0.231268
473Y	0	0	0.143719	0.00183486	0.0524733	0.339073
474Q	0.397898	0.043922	0.116891	0.00733945	0.12179	0.507633
475A	0.038038	0.137768	0.260784	0.0293578	0.349128	0.589423
476G	0	0	0.149051	0.00183486	0.24085	0.389269
477S	0	0	0.252643	0.00183486	0.182638	0.264139	√
478T	0	0	0.309102	0.00183486	0.124427	0.178509	√
479P	0	0	0.340478	0.00183486	0.0662163	0.116225
480C	0	0	0.354455	0.00183486	0.00832909	0.0688983
481N	0	0	0.359407	0.00183486	0.00180464	0.0567662
482G	0	0	0.35326	0.00183486	0.0526584	0.0979999
483V	0	0	0.337696	0.00183486	0.11036	0.154188
484E	0	0	0.3038	0.00183486	0.168572	0.230186	√
485G	0	0	0.243035	0.00183486	0.226783	0.338579
486F	0	0	0.131864	0.00183486	0.284994	0.505691	√
487N	0.247247	0.524626	0.642007	0.911927	0.347277	0.796962
488C	0.291792	0.222175	0.264807	0.344954	0.446578	0.761696
489Y	0	0	0.131599	0.00183486	0.199621	0.486443
490F	0	0	0.241362	0.00183486	0.141317	0.326391	√
491P	0	0	0.299525	0.00183486	0.0830133	0.221734
492L	0	0	0.329299	0.00183486	0.0247096	0.147955
493Q	0	0	0.336875	0.00183486	0.000694091	0.116326	√
494S	0	0	0.329244	0.00183486	0.0349822	0.171928	√
495Y	0	0	0.299396	0.00183486	0.0932858	0.255046
496G	0	0	0.241115	0.00183486	0.151589	0.375794	√
497F	0.452953	0	0.131149	0.00183486	0.209893	0.5672
498Q	0.245245	0.220023	0.46387	0.794495	0.418618	0.916939	√
499P	0.0640641	0.132849	0.206093	0.456881	0.59568	0.83031
500T	0.200701	0.553946	0.621344	0.955963	0.00393318	0.789669
501N	0.193694	0.0934057	0.0545906	0.0201835	0.00268382	0.641315	√
502G	0.332833	0.793911	0.746435	0.952294	0.0121235	0.736684
503V	0.257758	0	7.06295e-05	0.00183486	0	0.591322
504G	0.00650651	0.281754	0.515714	0.959633	0.0614965	0.937486
505Y	0.261261	0.612591	0.623293	0.941284	0.00134191	0.778771	√
506Q	0.33984	0.512191	0.537593	0.888073	0.00906946	0.809838
507P	0.200701	0.613971	0.744151	0.992661	0.00129564	0.77211
508Y	0.236737	0.235671	0.312545	0.0568807	0.00522882	0.632891
509R	0.302803	0.802851	0.823818	0.987156	0.0747305	0.760942
510V	0.443944	0	0.0496303	0.00183486	0.00208227	0.48495
511V	0.555055	0	0.0496289	0.00183486	0.000185091	0.498153
512V	0.480981	0.605937	0.641396	0.906422	0.0602934	0.783663
513L	0.504004	0.735908	0.657982	0.915596	0	0.76261
514S	0.377377	0.8115	0.75261	0.955963	0.0407663	0.739743
515F	0.348348	0	1.00082e-05	0.00183486	4.62727e-05	0.492905
516E	0.381381	0.960151	0.864167	0.987156	0.0204988	0.737032	√
517L	0.332833	0.536659	0.591138	0.924771	0.0308639	0.810299
518L	0.374875	0.650154	0.690585	0.965138	0.0140206	0.797751
519H	0.270771	0.875394	0.756794	0.959633	0	0.719446
520A	0.43043	0.936556	0.813732	0.981651	0.000277636	0.732912
521P	0.447948	0.909277	0.782626	0.968807	0.00296145	0.730784
522A	0.377878	0.939958	0.817466	0.979817	0.0128175	0.740956
523T	0.691191	0.0895386	0.376186	0.0733945	0.0199435	0.59648
524V	0.686186	0.722844	0.693251	0.922936	0.0534913	0.777351
525C	1	0	3.09946e-05	0.00183486	9.25455e-05	0.498605
526G	0.469469	0.693283	0.665653	0.913761	0.0323446	0.76941
527P	0.338338	0.856848	0.770316	0.976147	0.00273009	0.745264
528K	0.404404	0.922446	0.804181	0.972477	0.121975	0.739187
529K	0.551051	0.0838002	0.394593	0.0605505	0.127157	0.53593
530S	0	0	0.128908	0.00183486	0.0652446	0.356594
531T	0	0	0.213279	0.00183486	0.00684836	0.241997
532N	0	0	0.236138	0.00183486	0.000370182	0.233714
533L	0.329329	0	0.208208	0.00183486	0.0522882	0.335027
534V	0.323323	0	0.11705	0.00183486	0.110777	0.500798
535K	0.384885	0.659574	0.7332	0.946789	0.171672	0.789343
536N	0.508509	0.779934	0.691579	0.937615	0.000231364	0.738341
537K	0.392893	0.719561	0.722237	0.946789	0.0595067	0.746585
538C	1	0	0.0516231	0.00183486	0.00268382	0.478625
539V	0.925425	0	0.0543362	0.00183486	0.00323909	0.428642
540N	0.486987	0.108551	0.341596	0.121101	0.14215	0.657458
541F	0.653153	0	0.00393035	0.00183486	0.000231364	0.512607
542N	0.522523	0.721266	0.714601	0.924771	0.0787562	0.750761
543F	0.583584	0	7.20474e-05	0.00183486	0	0.501318
544N	0.57007	0.87985	0.835536	0.955963	0.122947	0.729268
545G	1	0	0.0583812	0.00183486	0.0407663	0.468664
546L	0.395896	0	0.0701622	0.00183486	0.000971727	0.336765
547T	0.578078	0.0969869	0.23498	0.0220183	0.0232289	0.467594	√
548G	1	0	0.0168919	0.00183486	0.00226736	0.479839
549T	0.525025	0.825308	0.837462	0.966972	0.139882	0.738332
550G	1	0	0.082711	0.00183486	0.0236454	0.472814
551V	0.724224	0	0.127435	0.00183486	0.000185091	0.342266
552L	0.623624	0	0.0827279	0.00183486	0.0352598	0.500004
553T	0.292793	0.628505	0.754191	0.983486	0.104761	0.788746
554E	0.197197	0.360161	0.484085	0.895413	0.002036	0.869257
555S	0.474975	0.909071	0.769824	0.948624	0.025959	0.736394
556N	0.423423	0.0710444	0.0522967	0.0165138	0.00268382	0.559943
557K	0.471972	0.920716	0.791681	0.965138	0.00943964	0.723552
558K	0.25025	0.514708	0.641601	0.987156	0.0695016	0.833375
559F	0.428929	0.0976981	0.548519	0.0954128	0.0540697	0.624492
560L	0.395896	0.828322	0.733101	0.946789	0.0128175	0.769381
561P	0.316316	0.243597	0.361639	0.699083	0.169913	0.880643
562F	0.386386	0.165211	0.508717	0.0844037	0.0334089	0.631714
563Q	0.86987	0	0.0150598	0.00183486	0	0.454675
564Q	0.323323	0.125933	0.526298	0.0990826	0.139142	0.648565
565F	0.630631	0	0.00719952	0.00183486	0.00115682	0.508115
566G	0.437437	0.909256	0.796667	0.952294	0.0461802	0.735451
567R	0.535035	0.905684	0.793336	0.954128	0.0207302	0.734837
568D	0.863363	0	0.000359924	0.00183486	0	0.546296
569I	0.304304	0.179793	0.302314	0.469725	0.37467	0.843034
570A	0.441942	0.0544556	0.15028	0.0311927	0.0105039	0.586459	√
571D	0.505506	0.808355	0.731548	0.957798	0.0156402	0.736547
572T	0.467467	0.832454	0.72701	0.950459	0.000277636	0.739942
573T	0.50951	0.930002	0.781326	0.957798	0	0.731828
574D	0.307307	0.705004	0.667035	0.946789	0.00143445	0.758743
575A	0.520521	0.889648	0.808356	0.954128	0.0741752	0.731023
576V	0.464965	0	0.0538863	0.00183486	0.0194345	0.4747
577R	0.601101	0	0.0596512	0.00183486	0.00411827	0.383831
578D	0.714214	0.159932	0.543735	0.0862385	0.046319	0.565433
579P	0.246246	0.939752	0.828289	0.985321	0.0473833	0.745127
580Q	0.0975976	0.358788	0.567444	0.979817	0.0439591	0.90702
581T	0.639139	0.152979	0.509242	0.0880734	0.0232289	0.65168
582L	0.371371	0.179297	0.32154	0.0422018	0.0248022	0.584971
583E	0	0	0.0104426	0.00183486	0.000509	0.506476
584I	0.418418	0.693021	0.701003	0.917431	0.079404	0.772365
585L	0.481481	0	8.1487e-05	0.00183486	0	0.534299
586D	0.269269	0.708069	0.74811	0.965138	0.0894915	0.790777
587I	0.750751	0	4.84254e-05	0.00183486	4.62727e-05	0.513657
588T	0.431431	0.713096	0.693476	0.943119	0.0189255	0.747816
589P	0.647147	0.612291	0.62081	0.904587	0.0417843	0.776949
590C	0.987487	0	1.69527e-05	0.00183486	0	0.514607
591S	0.467467	0.888992	0.778774	0.946789	0.0186479	0.731657
592F	0.56006	0.884043	0.761323	0.952294	0.0158253	0.740406
593G	0.806306	0.0636159	0.23702	0.0477064	0.0130026	0.563634
594G	0.51001	0.789693	0.751208	0.93211	0.0873166	0.756651
595V	0.986987	0	0.0496079	0.00183486	0.000277636	0.482884
596S	0.894895	0	0.0496051	0.00183486	0.000509	0.477534
597V	0.586587	0.791587	0.756743	0.943119	0.0591134	0.746956
598I	0.596096	0.675089	0.60323	0.880734	0.000370182	0.759273
599T	0.418919	0.933948	0.778045	0.954128	0	0.723855
600P	0.417417	0.950859	0.901642	0.994495	0.0583962	0.743894
601G	0	0	0.0496353	0.00183486	0.00148073	0.476216
602T	0	0	0.0496676	0.00183486	0.00314655	0.544728
603N	0.285786	0.362739	0.525531	0.882569	0.0985146	0.873671
604T	0.169169	0.62764	0.654744	0.955963	0.0440054	0.77038
605S	0.612613	0.0757185	0.182308	0.0238532	0.0948128	0.590582
606N	0.465966	0.0863167	0.267974	0.0330275	0.0153625	0.589339
607Q	0.541041	0	0.0128335	0.00183486	0.000832909	0.486129
608V	0.384384	0.896198	0.855742	0.976147	0.113507	0.744613
609A	0.956456	0	0.0172618	0.00183486	0.00471982	0.491629
610V	0.517017	0.0426062	0.420104	0.0385321	0.0306788	0.474256
611L	0.915415	0	0.0706456	0.00183486	0.00245245	0.344722
612Y	0.684184	0	0.0585783	0.00183486	0.0405349	0.468493
613Q	0.423924	0.897647	0.820769	0.959633	0.0969876	0.721906	√
614D	0.447447	0.918586	0.805788	0.959633	0.0155014	0.737276	√
615V	0.53003	0	4.84663e-05	0.00183486	9.25455e-05	0.513874
616N	0.430931	0.556409	0.669549	0.963303	0.087548	0.787623
617C	1	0	5.23197e-05	0.00183486	0	0.509659
618T	0.326326	0.815856	0.75543	0.959633	0.0150849	0.734575
619E	0.367868	0.873087	0.846907	0.966972	0.177086	0.739091
620V	0.791291	0	0.123709	0.00183486	0.117625	0.473676
621P	0	0	0.223065	0.00183486	0.0591366	0.318084
622V	0	0	0.26545	0.00183486	0.000925455	0.215847
623A	0	0	0.265454	0.00183486	0.000555273	0.226585
624I	0	0	0.223077	0.00183486	0.0583962	0.333498
625H	0	0	0.123733	0.00183486	0.116885	0.498348
626A	0.428929	0.649089	0.70972	0.93211	0.192633	0.784779
627D	0.298298	0.924985	0.820642	0.983486	0.000323909	0.748452
628Q	0.264264	0.216508	0.340386	0.688073	0.183749	0.894492
629L	0.515516	0.0330542	0.320335	0.0385321	0.0980982	0.634331
630T	0.277778	0.659056	0.648316	0.93578	0.025959	0.775212
631P	0.282282	0.775824	0.723003	0.970642	0.001018	0.748728
632T	0.162162	0.310303	0.472429	0.902752	0.100065	0.899102
633W	0.273774	0.0440575	0.151294	0.0183486	0.013581	0.624311
634R	0.318318	0.732073	0.694289	0.948624	0.00721855	0.741126
635V	0.210711	0.744874	0.688138	0.943119	0.04072	0.750528
636Y	0.258258	0.0812508	0.331772	0.0587156	0.0130952	0.5458
637S	0.337838	0	0.00872332	0.00183486	0.00180464	0.492715
638T	0.351351	0.759467	0.807589	0.955963	0.190782	0.732723
639G	0	0	0.116197	0.00183486	0.0803295	0.47004
640S	0	0	0.206193	0.00183486	0.0218407	0.315698
641N	0	0	0.232249	0.00183486	0.000323909	0.224779
642V	0	0	0.206181	0.00183486	0.0372495	0.320996
643F	0.762262	0	0.116169	0.00183486	0.095692	0.478463
644Q	0.668669	0.764995	0.756099	0.926606	0.154551	0.748158
645T	0.676677	0.735908	0.657982	0.915596	0	0.76261
646R	0.332332	0.862734	0.765485	0.968807	0.00198973	0.741297
647A	0.456957	0.923591	0.855456	0.963303	0.117394	0.741972
648G	1	0	0.103624	0.00183486	0.0583499	0.474934
649C	1	0	0.176252	0.00183486	0.000509	0.318922
650L	0.578579	0	0.176259	0.00183486	0.000879182	0.325843
651I	0.423423	0	0.103646	0.00183486	0.0590903	0.486309
652G	0.66967	0.763181	0.764346	0.93578	0.153533	0.762953
653A	0.714214	0.144816	0.410936	0.0733945	0.00883809	0.57895	√
654E	0.305806	0.0888372	0.386949	0.0733945	0.0138818	0.586411
655H	0.536537	0.824699	0.727822	0.946789	0.0311415	0.758603	√
656V	0.258258	0.550857	0.58275	0.92844	0.003054	0.78685
657N	0.0335335	0.224482	0.0887157	0.143119	0.00583036	0.721988
658N	0.331832	0.159968	0.231316	0.53578	0.113091	0.859893
659S	0.447447	0.886348	0.760042	0.957798	0.000740364	0.721601
660Y	0.200701	0.655118	0.695504	0.981651	0.001018	0.786152
661E	0.328328	0.578558	0.648554	0.957798	0.0574245	0.781077
662C	0.987487	0	0.0113297	0.00183486	0.00194345	0.516613
663D	0.574575	0.0376202	0.24104	0.0366972	0.0141595	0.502249
664I	0.552553	0	0.0113898	0.00183486	0.00208227	0.534701
665P	0.530531	0.508536	0.646231	0.922936	0.115497	0.819527
666I	0.406406	0	0.0496917	0.00183486	0.001018	0.516293
667G	1	0	0.0496728	0.00183486	0.00245245	0.500922
668A	0.44044	0.580671	0.616295	0.86789	0.0980056	0.790962
669G	0.764765	0.182858	0.654139	0.106422	0.0858359	0.659373
670I	0.399399	0	0.0589557	0.00183486	0.00462727	0.432949
671C	1	0	0.0535994	0.00183486	0.00495118	0.485368
672A	0.571071	0.764995	0.729222	0.926606	0.0594142	0.747359
673S	0.306306	0.757967	0.730611	0.976147	0.029013	0.762102
674Y	0.71972	0.168936	0.525668	0.0899083	0.0207302	0.594006
675Q	0.283784	0.767642	0.804699	0.965138	0.303873	0.761617
676T	0	0	0.130986	0.00183486	0.222063	0.486397
677Q	0	0	0.241018	0.00183486	0.163759	0.326361	√
678T	0	0	0.299328	0.00183486	0.105456	0.221712
679N	0	0	0.329185	0.00183486	0.0471519	0.147938	√
680S	0	0	0.336797	0.00183486	0.000740364	0.0942168
681P	0	0	0.329183	0.00183486	0.0125862	0.140809	√
682R	0	0	0.299322	0.00183486	0.0708436	0.211929
683R	0	0	0.241008	0.00183486	0.129147	0.312113
684A	0	0	0.130967	0.00183486	0.187451	0.463753
685R	0.278779	0.833959	0.808457	0.946789	0.245801	0.720183
686S	0.494494	0.148247	0.149574	0.300917	0.132386	0.784428
687V	0.54004	0.0439273	0.145194	0.0311927	0.0323446	0.617316
688A	0.335836	0.219977	0.285904	0.555963	0.249641	0.829824
689S	0.305806	0.841756	0.747957	0.959633	0.0192957	0.7417
690Q	0.315816	0.105428	0.448724	0.0788991	0.0243857	0.557747
691S	0.310811	0.850088	0.756466	0.957798	0.0289205	0.749287
692I	0.390891	0.647991	0.605564	0.899083	0	0.776242
693I	0.252252	0.660674	0.648499	0.946789	0.00578409	0.772598
694A	0.433934	0.913438	0.763987	0.948624	0	0.727731
695Y	0.405906	0.929201	0.809052	0.976147	0.00134191	0.741397
696T	0.472973	0.839257	0.774516	0.966972	0.00985609	0.728613
697M	0.355856	0	5.69431e-05	0.00183486	9.25455e-05	0.521152
698S	0.260761	0.502218	0.600733	0.906422	0.0937486	0.804957
699L	0.256256	0	6.72008e-05	0.00183486	0	0.527223
700G	0.27978	0.664142	0.680929	0.954128	0.0181389	0.757046
701A	0.305305	0.6031	0.614271	0.93211	0.00990236	0.794076	√
702E	0.260761	0.962581	0.842356	0.985321	0.00504373	0.747253
703N	0.366366	0.172336	0.494443	0.0880734	0.00828282	0.651579
704S	0.383383	0.878673	0.766094	0.961468	0.00509	0.724629
705V	0.403904	0.737546	0.666867	0.926606	0.00134191	0.76315
706A	0.304304	0.811042	0.719992	0.952294	0.000462727	0.740372
707Y	0.297297	0.717979	0.686289	0.963303	0.000416455	0.752168
708S	0.30981	0.194846	0.347432	0.526606	0.436537	0.85008
709N	0.652152	0.766236	0.680974	0.92844	0.00123394	0.750835
710N	0.385886	0.682543	0.64999	0.937615	0.000832909	0.763293
711S	0.37988	0.522332	0.664249	0.952294	0.0583499	0.81292
712I	0.593093	0	0.000113383	0.00183486	0	0.534066
713A	0.484985	0.78942	0.784657	0.950459	0.0659386	0.735777
714I	0.889389	0	0.0497518	0.00183486	0.000370182	0.471995
715P	1	0	0.0499119	0.00183486	0.00758873	0.525834
716T	0.641642	0.147052	0.267797	0.488073	0.260111	0.838585	√
717N	0.736737	0.165505	0.271698	0.53211	0.270267	0.85798
718F	1	0	0.000225021	0.00183486	9.25455e-05	0.560633
719T	0.659159	0.708965	0.711026	0.926606	0.0561288	0.748816
720I	0.738739	0	4.30097e-05	0.00183486	9.25455e-05	0.493437
721S	0.482983	0.725916	0.698941	0.943119	0.0284577	0.744294
722V	0.205706	0.594845	0.607092	0.933945	0.000647818	0.785697
723T	0.447948	0.503895	0.55432	0.911927	0.00546018	0.816536
724T	0.454955	0.798057	0.7904	0.968807	0.0931007	0.735105
725E	1	0	0.0826656	0.00183486	0.0326685	0.471044
726I	0.478478	0	0.127386	0.00183486	0.000138818	0.323346
727L	0.545546	0	0.0826584	0.00183486	0.0261904	0.467971
728P	0.547047	0.924268	0.850632	0.966972	0.0849105	0.729493
729V	0.583083	0.682086	0.638941	0.915596	0.0320207	0.76426
730S	0.622623	0.115919	0.0823827	0.0220183	0.00226736	0.611032
731M	0.436436	0.641783	0.62565	0.921101	0.0197585	0.774122
732T	0.425926	0.889999	0.833211	0.985321	0.0359539	0.748555	√
733K	1	0	1.54953e-05	0.00183486	4.62727e-05	0.496684
734T	0.552052	0.906882	0.800561	0.954128	0.0300619	0.737953
735S	0.51952	0.658176	0.699071	0.93578	0.0957383	0.775883
736V	0.68018	0	0.0840309	0.00183486	0.0369719	0.493117
737D	1	0	0.130546	0.00183486	0.000138818	0.34325
738C	1	0	0.0886802	0.00183486	0.021887	0.466438
739T	0.200701	0.150816	0.302821	0.0880734	0.118921	0.726685
740M	0.376376	0.902457	0.89099	0.988991	0.118736	0.750438
741Y	0.686687	0	0.0890538	0.00183486	0.0550646	0.479616
742I	0.574575	0	0.142303	0.00183486	0.00148073	0.328549
743C	0.987487	0	0.111141	0.00183486	0.00513627	0.314429
744G	0.774775	0.0264771	0.264112	0.0201835	0.073296	0.46787
745D	0.776276	0.0287999	0.336731	0.0366972	0.0349822	0.567435
746S	0.422422	0.494958	0.553444	0.880734	0.122114	0.821593
747T	0.222723	0.16154	0.254831	0.0385321	0.0275785	0.569924
748E	0.410911	0.939006	0.901666	0.99633	0.0520106	0.755466
749C	1	0	0.000190093	0.00183486	9.25455e-05	0.529151
750S	0.101101	0.597668	0.846975	0.99633	0.085003	0.781313
751N	0.290791	0	0.000218421	0.00183486	0	0.529453
752L	0.602603	0.644114	0.684205	0.902752	0.0915275	0.778177
753L	0.987487	0	0.0496756	0.00183486	0.000740364	0.494901
754L	0.446947	0	0.0496867	0.00183486	0.00124936	0.472006
755Q	0.626126	0.826551	0.842502	0.93945	0.189857	0.736244
756Y	1	0	0.116211	0.00183486	0.071769	0.471907
757G	1	0	0.206207	0.00183486	0.0131877	0.316837
758S	0.675676	0	0.232269	0.00183486	0.000138818	0.239039
759F	1	0	0.206212	0.00183486	0.0456712	0.345207
760C	1	0	0.116223	0.00183486	0.104252	0.517552
761T	0.234735	0.496519	0.627099	0.902752	0.230253	0.821544
762Q	0.445946	0.17149	0.686	0.102752	0.0728333	0.615623
763L	0.52953	0	0.0599156	0.00183486	0.00402573	0.410184
764N	1	0	0.0540044	0.00183486	0.00578409	0.47634	√
765R	0.357357	0.86029	0.81161	0.968807	0.0609875	0.731681
766A	0.686687	0.73444	0.687338	0.917431	0.0342418	0.763222
767L	1	0	0.000754332	0.00183486	4.62727e-05	0.512413
768T	0.240741	0.129957	0.122777	0.183486	0.0738976	0.748449
769G	0.616617	0.767142	0.715781	0.93578	0.0383138	0.750831
770I	0.529029	0	1.03543e-05	0.00183486	4.62727e-05	0.503398
771A	0.572072	0.911464	0.80087	0.952294	0.0270233	0.734594
772V	0.0530531	0.223304	0.523061	0.946789	0.430244	0.981099
773E	0.393894	0.948325	0.837482	0.985321	0.000509	0.745388
774Q	0.56957	0.766236	0.709063	0.92844	0.0320516	0.746352
775D	1	0	3.55136e-05	0.00183486	4.62727e-05	0.508435
776K	0.11962	0.741618	0.770528	0.987156	0.0277636	0.762275
777N	0.375375	0.489869	0.542764	0.908257	0.000786636	0.812727
778T	0.429429	0.944977	0.806176	0.972477	0.000231364	0.729869
779Q	0.196697	0.49611	0.587796	0.937615	0.00596918	0.815684
780E	0.35986	0.850013	0.765598	0.952294	0.0216556	0.740572	√
781V	0.75025	0	1.1041e-05	0.00183486	0	0.510134
782F	0.512012	0.73702	0.691897	0.922936	0.0384526	0.763058
783A	0.281281	0.522378	0.541676	0.86789	0.0248947	0.793384
784Q	0.352853	0.0646239	0.199619	0.0256881	0.0334552	0.624249
785V	0.509009	0	0.0133431	0.00183486	0.000323909	0.492929
786K	0.512513	0.7854	0.760818	0.93945	0.0856508	0.74633
787Q	0.426927	0	3.9464e-05	0.00183486	0.000185091	0.497484
788I	0.296797	0.93132	0.837678	0.974312	0.0461339	0.737441
789Y	0.415916	0.0245902	0.317292	0.0440367	0.0527509	0.539525
790K	0.466466	0.90066	0.780402	0.961468	0.0283189	0.736118
791T	0.268769	0.937951	0.800697	0.970642	0.000971727	0.736114
792P	0.547548	0.802473	0.70952	0.944954	0.00157327	0.737738
793P	0.157157	0.895705	0.786509	0.970642	0.00226736	0.735042
794I	0.104104	0.795171	0.732298	0.970642	0.00175836	0.742177
795K	0.293794	0.715528	0.693099	0.961468	0.021378	0.78929
796D	0.273273	0.273596	0.347857	0.66055	0.0742215	0.858032	√
797F	0.314815	0	9.46463e-05	0.00183486	0	0.559764
798G	0.453453	0.840142	0.759977	0.946789	0.0175836	0.736497
799G	0.391892	0.92091	0.888321	0.988991	0.107538	0.742772
800F	0.475976	0	0.0853236	0.00183486	0.0492342	0.475488
801N	0.766266	0	0.133588	0.00183486	0.000786636	0.331886
802F	0.762262	0	0.0945039	0.00183486	0.0102725	0.389462
803S	0.636136	0.0966351	0.469418	0.0733945	0.127666	0.591188
804Q	0.422422	0.537931	0.642373	0.889908	0.364814	0.813068
805I	0.493493	0	0.131027	0.00183486	0.211651	0.513751
806L	0.624124	0	0.241042	0.00183486	0.153255	0.34327
807P	0.526026	0	0.299344	0.00183486	0.0948591	0.233173
808D	0	0	0.329198	0.00183486	0.0364629	0.156206
809P	0	0	0.336812	0.00183486	0.000462727	0.107236
810S	0	0	0.329205	0.00183486	0.0228587	0.15396
811K	0	0	0.299359	0.00183486	0.0812549	0.230064
812P	0	0	0.241073	0.00183486	0.139651	0.338684
813S	0	0	0.131082	0.00183486	0.198047	0.506321
814K	0.290791	0.597479	0.797132	0.976147	0.317477	0.799012
815R	1	0	0.0497631	0.00183486	0.00263755	0.505969
816S	1	0	0.0497306	0.00183486	0.000370182	0.478456
817F	0.573073	0.794835	0.836695	0.944954	0.27958	0.745102
818I	0.836336	0	0.12602	0.00183486	0.164361	0.477172
819E	0.901902	0	0.228352	0.00183486	0.106011	0.32042
820D	0.968969	0	0.275586	0.00183486	0.0482162	0.21812
821L	0.909409	0	0.28378	0.00183486	0.00111055	0.15326
822L	0.974975	0	0.255918	0.00183486	0.0117995	0.199966
823F	0.847347	0	0.182213	0.00183486	0.0701495	0.294961
824N	0.547047	0.0431238	0.268984	0.00917431	0.141086	0.43709
825K	0.987487	0	0.104037	0.00183486	0.00106427	0.335385
826V	0.987487	0	0.0728627	0.00183486	0.0472445	0.477177
827T	0.618619	0.770906	0.771325	0.930275	0.121049	0.743014
828L	0.727227	0	0.000115707	0.00183486	0	0.53209
829A	0.630631	0.479051	0.551967	0.847706	0.0875017	0.810878
830D	0.987487	0	0.000134662	0.00183486	0	0.541488
831A	0.499499	0.939438	0.958426	0.992661	0.100944	0.74671
832G	1	0	0.0827219	0.00183486	0.0164962	0.477365
833F	0.834835	0	0.127418	0.00183486	0.000138818	0.325781
834I	0.619119	0	0.0826756	0.00183486	0.0423627	0.474154
835K	0.434935	0.897601	0.844361	0.970642	0.101453	0.740813
836Q	0.441942	0.868283	0.791495	0.970642	0.0319745	0.72497
837Y	1	0	7.39247e-06	0.00183486	4.62727e-05	0.484824
838G	0.375876	0.845064	0.787988	0.972477	0.0270233	0.734
839D	0.392893	0.737479	0.690992	0.922936	0.0222572	0.754555
840C	1	0	4.32377e-05	0.00183486	4.62727e-05	0.49656
841L	0.460961	0.730937	0.713312	0.917431	0.0707394	0.76227
842G	0	0	4.62636e-05	0.00183486	0	0.523146
843D	0.524024	0.669214	0.672843	0.941284	0.0282379	0.768459
844I	0.217217	0.62351	0.687033	0.963303	0.0156865	0.792563
845A	0.374374	0.690111	0.637694	0.917431	0.00138818	0.759542
846A	0.525025	0.764995	0.756099	0.926606	0.142566	0.748164
847R	0.952953	0	0.11617	0.00183486	0.0837074	0.47847
848D	1	0	0.206183	0.00183486	0.0252649	0.321004
849L	1	0	0.232252	0.00183486	0.000323909	0.227959
850I	0.695696	0	0.206197	0.00183486	0.0338254	0.32676
851C	1	0	0.116204	0.00183486	0.0923141	0.487677
852A	0.598599	0.732977	0.765741	0.919266	0.18597	0.765176
853Q	1	0	0.000136229	0.00183486	0.000555273	0.513347
854K	0.417417	0.926406	0.924859	0.985321	0.141826	0.744365
855F	0.602102	0	0.103672	0.00183486	0.0597844	0.47625
856N	0.782783	0	0.17629	0.00183486	0.00138818	0.31983	√
857G	0.987487	0	0.176299	0.00183486	0.000323909	0.317177
858L	0.530531	0	0.103702	0.00183486	0.0576558	0.471537
859T	0.547047	0.902187	0.91637	0.954128	0.290454	0.735727	√
860V	1	0	0.12377	0.00183486	0.115589	0.471837
861L	1	0	0.223099	0.00183486	0.0571006	0.316926
862P	0.987487	0	0.265467	0.00183486	0.000416455	0.215802
863P	1	0	0.265461	0.00183486	0.00208227	0.219124
864L	0.682182	0	0.223075	0.00183486	0.0604322	0.322676
865L	0.699199	0	0.123723	0.00183486	0.118921	0.480992
866T	0.51952	0.935686	0.91729	0.987156	0.200037	0.752529
867D	0.411912	0.121176	0.344719	0.0642202	0.00925455	0.550921
868E	0.236236	0.903852	0.784361	0.966972	0.0220721	0.743206
869M	0.666166	0.735463	0.669574	0.921101	0.0196196	0.777008
870I	0.615115	0.160445	0.625161	0.102752	0.0163343	0.597979
871A	0.673674	0.73612	0.669459	0.921101	0.0197122	0.775609
872Q	0.515516	0.764598	0.74984	0.950459	0.0550646	0.748694
873Y	1	0	0.049684	0.00183486	0.000138818	0.478282
874T	0.968969	0	0.0497902	0.00183486	0.00402573	0.554129
875S	0.425926	0.210966	0.37519	0.669725	0.281338	0.894002
876A	0.588088	0.111861	0.624428	0.185321	0.325251	0.745345
877L	0.659159	0.657864	0.619319	0.906422	0.0191569	0.791298
878L	0.425425	0.705902	0.645588	0.915596	0.0181852	0.768582
879A	0.505506	0.118347	0.615398	0.249541	0.497987	0.717574
880G	0.513013	0.830053	0.751504	0.968807	0.00189718	0.752628
881T	0.333333	0.371541	0.569196	0.917431	0.320658	0.893023
882I	0.533534	0.681028	0.617299	0.895413	0.000832909	0.764281
883T	0.444444	0.972635	0.847384	0.985321	0.000740364	0.736912
884S	0.554054	0.745359	0.733258	0.944954	0.0615427	0.748675
885G	0.588088	0	0.0496358	0.00183486	0.000879182	0.478264
886W	0.812813	0	0.0496792	0.00183486	0.000185091	0.541186
887T	0.694194	0.321279	0.446796	0.783486	0.104993	0.867982
888F	0.626126	0.874667	0.735991	0.937615	0	0.7287	√
889G	0.686186	0.737068	0.666823	0.917431	0.0128175	0.773031
890A	0.679179	0.14087	0.413396	0.0752294	0.00805146	0.64384
891G	0.743243	0.165449	0.545296	0.0807339	0.17852	0.534594
892A	0	0	0.139091	0.00183486	0.117949	0.355926
893A	0	0	0.239512	0.00183486	0.059553	0.24164
894L	0	0	0.287089	0.00183486	0.00624682	0.16266
895Q	0	0	0.301881	0.00183486	0.00555273	0.169922
896I	0.646647	0	0.284587	0.00183486	0.0581648	0.245401
897P	1	0	0.233661	0.00183486	0.116561	0.36153
898F	0.977477	0	0.127915	0.00183486	0.174957	0.543822
899A	0.557057	0.394388	0.576355	0.875229	0.327565	0.871343
900M	0.453453	0.161198	0.633797	0.0972477	0.0898616	0.629364
901Q	0.516016	0	0.0598855	0.00183486	0.00235991	0.420801
902M	0.495996	0	0.0540566	0.00183486	0.00902318	0.482938
903A	0.50951	0.937378	0.97333	0.990826	0.322197	0.750751
904Y	0.890891	0	0.131022	0.00183486	0.198834	0.480515
905R	1	0	0.241039	0.00183486	0.14053	0.322684
906F	0.473974	0	0.299339	0.00183486	0.0822266	0.219199
907N	1	0	0.329193	0.00183486	0.023923	0.146114
908G	1	0	0.336802	0.00183486	0.000786636	0.0974831
909I	0.633634	0	0.329187	0.00183486	0.0358614	0.145828
910G	0.977477	0	0.299327	0.00183486	0.0940725	0.218796
911V	0.834835	0	0.241015	0.00183486	0.152376	0.322096
912T	1	0	0.130978	0.00183486	0.21068	0.47958
913Q	0.598599	0.791587	0.791555	0.943119	0.269145	0.749031
914N	0.535536	0.248126	0.402828	0.722936	0.217713	0.890576
915V	1	0	0.0497335	0.00183486	0.00434964	0.552457
916L	1	0	0.049652	0.00183486	0.000138818	0.469722
917Y	0.468969	0.835565	0.762683	0.93211	0.0546481	0.731221
918E	0.661662	0.189607	0.347866	0.611009	0.194947	0.870019
919N	1	0	0.082941	0.00183486	0.0319282	0.542382
920Q	1	0	0.127589	0.00183486	0.000185091	0.382798
921K	0.948448	0	0.0828578	0.00183486	0.026977	0.523961
922L	0.446947	0.459141	0.656861	0.908257	0.209986	0.834329
923I	1	0	0.0828134	0.00183486	0.0458563	0.523858
924A	0.974975	0	0.127485	0.00183486	4.62727e-05	0.357425
925N	0.792793	0	0.0827415	0.00183486	0.0129101	0.468403
926Q	0.452452	0.840422	0.864697	0.972477	0.130119	0.730425
927F	1	0	0.0496986	0.00183486	0.000231364	0.468513
928N	1	0	0.0497349	0.00183486	0.000879182	0.526341
929S	0.416416	0.427995	0.598856	0.882569	0.125908	0.838921
930A	1	0	0.0497669	0.00183486	0.00319282	0.526239
931I	0.644645	0	0.0497741	0.00183486	0.000370182	0.546601
932G	0.327828	0.256491	0.389842	0.704587	0.085512	0.876815
933K	0.407908	0.557349	0.625207	0.911927	0.0644579	0.794072
934I	0.822322	0	0.0537817	0.00183486	0.00453473	0.508002
935Q	1	0	0.0593397	0.00183486	0.003563	0.446028
936D	0.482983	0.107284	0.54709	0.0954128	0.151543	0.686007
937S	0.653654	0.905145	0.809169	0.955963	0.0269153	0.751963
938L	0.653654	0	0.000112112	0.00183486	0	0.55162
939S	0.494494	0.435217	0.607031	0.902752	0.144417	0.840213
940S	0.530531	0	0.0827847	0.00183486	0.0373884	0.526956
941T	0.938438	0	0.127494	0.00183486	4.62727e-05	0.371891
942A	0.513013	0	0.0827915	0.00183486	0.021378	0.510692
943S	0.40991	0.500978	0.682256	0.93945	0.138911	0.80908
944A	1	0	0.0497629	0.00183486	0.000231364	0.510976
945L	0.814314	0	0.0497769	0.00183486	0.00120309	0.530827
946G	0.33984	0.475226	0.693607	0.948624	0.191812	0.847898
947K	0.974975	0	0.0828149	0.00183486	0.0225811	0.530879
948L	0.459459	0	0.127502	0.00183486	4.62727e-05	0.376233
949Q	1	0	0.0827796	0.00183486	0.0361853	0.520911
950D	0.46997	0.491728	0.635033	0.906422	0.202489	0.828684	√
951V	0.843343	0.00223838	0.11251	0.00733945	0.049373	0.542097
952V	0.896396	0	0.0863724	0.00183486	0.00115682	0.370478
953N	1	0	0.0653058	0.00183486	0.013234	0.479947
954Q	0.546046	0.732515	0.778237	0.941284	0.130304	0.749958	√
955N	0.907407	0	0.0496899	0.00183486	0.000740364	0.479789
956A	1	0	0.0497011	0.00183486	0.00106427	0.487241
957Q	0.544044	0.664264	0.745744	0.92844	0.157281	0.764143
958A	0.889389	0	0.0827452	0.00183486	0.0385915	0.486834
959L	0.987487	0	0.127443	0.00183486	0.000231364	0.335872
960N	0.732733	0	0.0827114	0.00183486	0.02036	0.469846
961T	0.495495	0.880647	0.862964	0.963303	0.130859	0.732863
962L	1	0	0.0145542	0.00183486	0.00185091	0.491465
963V	0.534535	0.03457	0.48972	0.053211	0.0222803	0.533158
964K	0.302302	0.862631	0.777323	0.957798	0.105733	0.745873
965Q	0.834835	0.03457	0.526128	0.053211	0.0796585	0.533009
966L	1	0	0.1026	0.00183486	0.00795891	0.354944
967S	0.822823	0	0.137859	0.00183486	0.000971727	0.328087
968S	0.642142	0	0.0871956	0.00183486	0.0517329	0.468347
969N	0.430931	0.916899	0.935994	0.972477	0.282125	0.72953	√
970F	1	0	0.120154	0.00183486	0.114294	0.468458
971G	1	0	0.215213	0.00183486	0.0560363	0.314943
972A	1	0	0.249619	0.00183486	0.000740364	0.215773
973I	1	0	0.237417	0.00183486	0.00347045	0.228126
974S	1	0	0.172121	0.00183486	0.0617278	0.335817
975S	0.768268	0.0271186	0.195005	0.00733945	0.128407	0.502069
976V	0.585586	0.815488	0.849586	0.957798	0.346259	0.755177
977L	0.774775	0	0.124409	0.00183486	0.127481	0.482509
978N	0.501502	0	0.225549	0.00183486	0.0690852	0.323835
979D	0.66016	0	0.268863	0.00183486	0.0115219	0.220553
980I	0.987487	0	0.273067	0.00183486	0.00120309	0.189492
981L	0.825826	0	0.235131	0.00183486	0.0485401	0.2702	√
982S	0.663163	0.0136816	0.259752	0.00366972	0.156078	0.399051	√
983R	1	0	0.199368	0.00183486	0.002036	0.278392
984L	1	0	0.188883	0.00183486	0.0113368	0.316725
985D	0.919419	0	0.108836	0.00183486	0.0680209	0.468894
986K	0.387888	0.875488	0.885837	0.963303	0.193975	0.729755
987V	0.661161	0	0.0575328	0.00183486	0.0124474	0.474254
988E	0.964965	0	0.0680685	0.00183486	0.00342418	0.390559
989A	0.834835	0.03457	0.511822	0.053211	0.0918976	0.576164
990E	0.416917	0.470821	0.533678	0.886239	0.113692	0.83719
991V	0.639139	0.610869	0.672231	0.902752	0.177872	0.772152
992Q	0.96046	0	0.123745	0.00183486	0.116237	0.491613
993I	0.896396	0	0.223087	0.00183486	0.0577484	0.329327
994D	1	0	0.265468	0.00183486	0.000647818	0.224023
995R	1	0	0.26547	0.00183486	0.00166582	0.216286
996L	1	0	0.223099	0.00183486	0.0597844	0.318619
997I	1	0	0.123768	0.00183486	0.118273	0.474503
998T	0.626627	0.905145	0.917398	0.955963	0.275307	0.740559
999G	1	0	0.0827364	0.00183486	0.0404424	0.474021
1000R	1	0	0.127422	0.00183486	0.000323909	0.321716
1001L	0.873874	0	0.0826719	0.00183486	0.0186016	0.463187
1002Q	0.557558	0.936246	0.844182	0.955963	0.0769978	0.720714
1003S	0.534034	0.810327	0.802042	0.957798	0.143769	0.74003
1004L	1	0	0.116164	0.00183486	0.084494	0.474057
1005Q	0.654154	0	0.206183	0.00183486	0.0260978	0.318271
1006T	0.626627	0	0.232258	0.00183486	0.000370182	0.22306
1007Y	0.826827	0	0.206211	0.00183486	0.0330387	0.32071
1008V	0.890891	0	0.116231	0.00183486	0.0915275	0.47799
1009T	0.576076	0.762174	0.828936	0.941284	0.233862	0.747247
1010Q	0.851852	0	0.0827549	0.00183486	0.0241081	0.477662
1011Q	0.889389	0	0.127442	0.00183486	0.000277636	0.335177
1012L	1	0	0.082699	0.00183486	0.0348896	0.486669
1013I	0.519019	0.73444	0.722139	0.917431	0.0933321	0.763826
1014R	0.583083	0.751172	0.670009	0.922936	9.25455e-05	0.752401
1015A	0.492492	0.59648	0.602053	0.919266	0.0297534	0.790314
1016A	0.452953	0.112436	0.660887	0.108257	0.0470594	0.612965
1017E	0.476476	0.900059	0.793906	0.965138	0.051409	0.744089
1018I	0.538038	0.0368272	0.394236	0.0495413	0.0144834	0.524449
1019R	0.528529	0.0213417	0.198221	0.0220183	0.00680209	0.495869
1020A	0.373373	0.867986	0.824149	0.966972	0.109759	0.729716
1021S	0.847848	0	0.0496173	0.00183486	0.000832909	0.468059
1022A	0.918418	0	0.0496311	0.00183486	0.000462727	0.509548
1023N	0.3999	0.531295	0.59783	0.891743	0.0613576	0.806546
1024L	0.66016	0.670662	0.648266	0.904587	0.0379436	0.775215
1025A	0.977477	0	1.57692e-05	0.00183486	4.62727e-05	0.515869
1026A	0.28979	0.941875	0.841557	0.981651	0.0221646	0.739865
1027T	0.451952	0.938441	0.869617	0.961468	0.176068	0.734338	√
1028K	1	0	0.123699	0.00183486	0.117579	0.471084
1029M	0.564064	0	0.223057	0.00183486	0.0590903	0.316456
1030S	0.659159	0	0.265442	0.00183486	0.000647818	0.214722
1031E	1	0	0.265443	0.00183486	0.000323909	0.215822
1032C	1	0	0.223059	0.00183486	0.0584425	0.317909
1033V	1	0	0.123702	0.00183486	0.116931	0.473392
1034L	0.631632	0.89087	0.835613	0.950459	0.17542	0.738556
1035G	0.552052	0.910211	0.817814	0.955963	0.0586738	0.720217
1036Q	1	0	0.0496174	0.00183486	0.000416455	0.462896
1037S	0.87988	0	0.0496646	0.00183486	0.000555273	0.517061
1038K	0.412913	0.495391	0.640505	0.930275	0.12924	0.821518
1039R	1	0	0.00735046	0.00183486	0.000832909	0.54575
1040V	0.450951	0.180289	0.582531	0.100917	0.0733423	0.652687
1041D	0.528529	0.891784	0.839385	0.961468	0.0948128	0.740471
1042F	1	0	0.0826734	0.00183486	0.0301698	0.473975
1043C	1	0	0.127401	0.00183486	0.000185091	0.329936
1044G	1	0	0.0826854	0.00183486	0.0287354	0.470413
1045K	0.416917	0.894566	0.856144	0.959633	0.116098	0.733954
1046G	1	0	0.0001128	0.00183486	0.000740364	0.496087
1047Y	0.474975	0.952355	0.958734	0.990826	0.184397	0.750195
1048H	1	0	0.116196	0.00183486	0.0893989	0.479581
1049L	0.563564	0	0.206193	0.00183486	0.0309102	0.321701
1050M	0.374374	0	0.232249	0.00183486	0.000323909	0.227115
1051S	1	0	0.206181	0.00183486	0.0281801	0.317725
1052F	0.582583	0	0.11617	0.00183486	0.0866226	0.473236
1053P	0.600601	0.857348	0.825829	0.944954	0.156124	0.738547
1054Q	0.798799	0.0370724	0.303086	0.0366972	0.041846	0.598306
1055S	0.414915	0.399977	0.541334	0.86055	0.164731	0.854298
1056A	1	0	0.0497164	0.00183486	0.00448845	0.534909
1057P	1	0	0.0497212	0.00183486	0.000971727	0.478408
1058H	0.485485	0.95727	1	0.990826	0.257045	0.746513
1059G	1	0	0.127673	0.00183486	0.139605	0.477886
1060V	0.514014	0	0.233137	0.00183486	0.0812086	0.320831
1061V	0.486486	0	0.283552	0.00183486	0.022905	0.217797
1062F	1	0	0.299952	0.00183486	0.000601546	0.148909
1063L	0.487988	0	0.283549	0.00183486	0.0365555	0.215233
1064H	1	0	0.23313	0.00183486	0.0949054	0.317101
1065V	0.587588	0	0.127659	0.00183486	0.153302	0.471954
1066T	0.472973	0.905144	0.936168	0.976147	0.285549	0.735649
1067Y	0.987487	0	0.0827442	0.00183486	0.0155939	0.471302
1068V	0.674174	0	0.127445	0.00183486	4.62727e-05	0.346181
1069P	1	0	0.0827159	0.00183486	0.0431725	0.50311
1070A	0.475475	0.537128	0.62983	0.917431	0.104484	0.794726
1071Q	0.315315	0.191138	0.319999	0.689908	0.173604	0.901142	√
1072E	0.438438	0.904636	0.769398	0.957798	4.62727e-05	0.731476
1073K	0.212212	0.452635	0.491163	0.844037	0.0113831	0.824717
1074N	0.527528	0.802686	0.712461	0.946789	0.001018	0.74058
1075F	0.470971	0.57975	0.577957	0.906422	0.00291518	0.777555
1076T	0.376877	0.532647	0.578963	0.93211	0.001018	0.798845
1077T	0.51001	0.748915	0.674187	0.930275	0.00175836	0.751187
1078A	0.652152	0.728345	0.662979	0.917431	0.0235065	0.773397
1079P	0.738739	0.159833	0.575924	0.0972477	0.0169358	0.609473
1080A	0.654154	0.902904	0.817075	0.950459	0.0693166	0.743537
1081I	0.654154	0	0.0495937	0.00183486	0.000185091	0.476376
1082C	1	0	0.0495947	0.00183486	0.00148073	0.476642
1083H	0.337838	0.882198	0.826298	0.970642	0.0627458	0.745579
1084D	0.30981	0.656628	0.704404	0.968807	0.0751469	0.794301
1085G	0.697197	0.0123702	0.0695377	0.0165138	0.00411827	0.552076
1086K	0.365365	0.811908	0.768496	0.966972	0.0197122	0.758333
1087A	0.531031	0.932522	0.859879	0.987156	0.0357225	0.7499
1088H	0.444444	0	3.6212e-05	0.00183486	9.25455e-05	0.497571
1089F	0.623624	0.876459	0.80348	0.944954	0.0738513	0.728342
1090P	0.96046	0	0.00983229	0.00183486	0.000555273	0.487751
1091R	0.450951	0.035592	0.20137	0.0366972	0.0176299	0.552472
1092E	0.288789	0.588196	0.692469	0.943119	0.156124	0.772351	√
1093G	1	0	0.103744	0.00183486	0.0569617	0.49139
1094V	0.558058	0	0.176444	0.00183486	0.000740364	0.329257
1095F	1	0	0.176584	0.00183486	0.00249873	0.327277
1096V	0.83033	0	0.104217	0.00183486	0.0604785	0.488355
1097S	0.106607	0.215765	0.241266	0.33578	0.254546	0.766705
1098N	0.325325	0.546912	0.603581	0.93945	0.0340567	0.798765
1099G	0.43994	0.762459	0.688828	0.943119	0.00115682	0.753313
1100T	0.395395	0.400105	0.522708	0.941284	0.0142057	0.868575
1101H	0.343844	0.350391	0.445774	0.776147	0.117348	0.855271	√
1102W	0.987487	0	0.0260975	0.00183486	0.00930082	0.543925
1103F	0.308308	0.0598009	0.203252	0.012844	0.0332238	0.487902
1104V	0.485485	0	0.0813726	0.00183486	0.000879182	0.353194
1105T	1	0	0.0631258	0.00183486	0.0360465	0.467256
1106Q	0.557057	0.91764	0.825342	0.954128	0.0938874	0.725631
1107R	0.551051	0.929677	0.774539	0.952294	9.25455e-05	0.723386
1108N	0.511011	0.163204	0.27822	0.506422	0.202744	0.842557
1109F	0.670671	0	0.0498879	0.00183486	0.00444218	0.527894
1110Y	0.664164	0	0.0497468	0.00183486	0.000323909	0.47543
1111E	0.321822	0.730279	0.760562	0.954128	0.0841701	0.743053
1112P	1	0	4.58328e-05	0.00183486	9.25455e-05	0.492962
1113Q	0.563564	0.921753	0.80737	0.959633	0.0297996	0.739419
1114I	0.403403	0.817852	0.749785	0.952294	0.0245014	0.745493
1115I	0	0	1.84028e-05	0.00183486	0	0.511218
1116T	0.615115	0.735366	0.701612	0.926606	0.0543473	0.763066
1117T	0.576577	0.0544684	0.224002	0.0458716	0.0685299	0.620768
1118D	0.371371	0.194911	0.307075	0.6	0.250844	0.867034	√
1119N	0.791792	0.012449	0.050901	0.00550459	0.00212855	0.57886
1120T	0.537538	0.791039	0.730998	0.944954	0.0320901	0.756347
1121F	0.317317	0.107518	0.565929	0.194495	0.291194	0.699746
1122V	0.724224	0	0.00378019	0.00183486	0.000971727	0.54222
1123S	0.34034	0.660987	0.675063	0.944954	0.0411827	0.766429
1124G	0.402402	0.935485	0.836244	0.979817	0.0197585	0.738727
1125N	0.38038	0	3.37965e-05	0.00183486	4.62727e-05	0.507791
1126C	0.375876	0.650903	0.712579	0.972477	0.0583499	0.784814
1127D	0.394394	0.907454	0.765476	0.954128	0	0.725208
1128V	0.422923	0.811145	0.746065	0.950459	0.0255425	0.731305
1129V	0.654655	0	3.75105e-06	0.00183486	4.62727e-05	0.475028
1130I	0.382883	0.865275	0.777897	0.957798	0.0341955	0.733148	√
1131G	0.347848	0.949098	0.822634	0.979817	0.004072	0.73802
1132I	0.43994	0.760011	0.675853	0.926606	0.000832909	0.748212
1133V	0.346847	0.880083	0.753433	0.954128	0	0.718679
1134N	0.626126	0.742201	0.662312	0.919266	0.000509	0.744999
1135N	0.511512	0.82222	0.724302	0.946789	0.000509	0.72547
1136T	0.386887	0.856139	0.767844	0.963303	0.0401647	0.740487
1137V	0.766266	0.038926	0.301633	0.0348624	0.00450388	0.521513
1138Y	0.326827	0.038926	0.301636	0.0348624	0.00607715	0.521329
1139D	0.425926	0.931149	0.832271	0.985321	0.0479385	0.755763	√
1140P	0.548549	0.907846	0.786057	0.957798	0.00846791	0.719092
1141L	0.392392	0.0353538	0.11284	0.0146789	0.00837536	0.5834
1142Q	0.439439	0	0.015752	0.00183486	4.62727e-05	0.501375
1143P	0.368368	0.659046	0.751074	0.987156	0.0630697	0.783358
1144E	0.412412	0.91566	0.824593	0.985321	0.0137893	0.751531
1145L	0.659159	0.102792	0.360547	0.0697248	0.00953218	0.577593
1146D	0.268268	0.82983	0.759591	0.965138	0.0267456	0.752392
1147S	0.567067	0.851847	0.810572	0.943119	0.177456	0.741568
1148F	1	0	0.123717	0.00183486	0.11707	0.474949
1149K	0.762262	0	0.223085	0.00183486	0.0585813	0.318834
1150E	0.667167	0	0.265491	0.00183486	0.000832909	0.216404
1151E	0.987487	0	0.265528	0.00183486	0.001018	0.247299
1152L	0.895896	0	0.22321	0.00183486	0.0589515	0.36456
1153D	0.728228	0	0.12397	0.00183486	0.11744	0.549192
1154K	0.546046	0.312062	0.575033	0.811009	0.320716	0.88258
1155Y	0.505005	0	0.103903	0.00183486	0.0613576	0.54888
1156F	0.873874	0	0.176412	0.00183486	0.00323909	0.364315
1157K	0.964965	0	0.176353	0.00183486	0.000601546	0.316172
1158N	1	0	0.103706	0.00183486	0.0560826	0.46993
1159H	0.474474	0.874722	0.89488	0.976147	0.173569	0.732855
1160T	0.794795	0	0.0496513	0.00183486	0.000601546	0.469676
1161S	0.884885	0	0.0496134	0.00183486	0.000277636	0.466461
1162P	0.277277	0.902837	0.826101	0.966972	0.0583962	0.726281
1163D	0.354354	0.895583	0.785244	0.976147	0	0.73481
1164V	0.555055	0.932017	0.785998	0.954128	0.00448845	0.7373
1165D	0.697698	0.156381	0.505335	0.0880734	0.0318356	0.660029
1166L	0.726727	0	0.00759457	0.00183486	0.000277636	0.496467
1167G	0.406406	0.789224	0.785977	0.948624	0.106057	0.730692
1168D	0	0	0.0496292	0.00183486	0.000416455	0.468934
1169I	0.461461	0	0.049618	0.00183486	0.000925455	0.484359
1170S	0.3999	0.701883	0.707255	0.937615	0.0603859	0.759442
1171G	0.286787	0.638917	0.743643	0.977982	0.0629309	0.786902
1172I	0.750751	0	0.0496512	0.00183486	0.00208227	0.498822
1173N	1	0	0.0496298	0.00183486	0.000416455	0.485627
1174A	0.449449	0.681621	0.677932	0.911927	0.0589515	0.760056
1175S	0.647648	0.84599	0.76864	0.933945	0.0587664	0.734115
1176V	0.421922	0	0.0496237	0.00183486	0.000416455	0.470545	√
1177V	0.659159	0	0.0496694	0.00183486	0.000601546	0.497207
1178N	0.643143	0.581914	0.695658	0.93211	0.117949	0.783649
1179I	0.603604	0	0.0498662	0.00183486	0.00185091	0.497543
1180Q	0.502503	0	0.0500868	0.00183486	0.00217482	0.515743
1181K	0.194194	0.117931	0.292827	0.475229	0.220536	0.817126
1182E	0.918919	0	0.0500573	0.00183486	0.00430336	0.514718
1183I	0.549049	0	0.0497969	0.00183486	0.000786636	0.476598
1184D	0.363363	0.806179	0.778815	0.957798	0.114479	0.744572
1185R	0.598098	0.128423	0.521991	0.0825688	0.080931	0.577515
1186L	0.807307	0	0.0937583	0.00183486	0.01018	0.381346
1187N	0.529029	0	0.133206	0.00183486	0.000694091	0.348133
1188E	0.671171	0	0.0851728	0.00183486	0.0492342	0.497235
1189V	0.621121	0.650024	0.672946	0.900917	0.110962	0.783214
1190A	0.503003	0.899885	0.795671	0.952294	0.0136505	0.739595
1191K	0.876877	0	9.83745e-05	0.00183486	0	0.552209
1192N	0.281782	0.413475	0.587552	0.904587	0.125075	0.852324
1193L	1	0	0.0498703	0.00183486	0.00111055	0.53309
1194N	1	0	0.0500651	0.00183486	0.000416455	0.542247
1195E	0.493994	0.12995	0.354415	0.561468	0.518347	0.869891
1196S	1	0	0.083118	0.00183486	0.0362778	0.5421
1197L	0.566066	0	0.127644	0.00183486	4.62727e-05	0.38117
1198I	1	0	0.0828094	0.00183486	0.0224885	0.488625
1199D	0.648649	0.720515	0.7454	0.919266	0.118504	0.767811
1200L	1	0	0.000118102	0.00183486	0	0.518654
1201Q	0.612613	0.788547	0.782654	0.93211	0.128962	0.757028
1202E	0.643644	0	0.0827065	0.00183486	0.034103	0.482972
1203L	0.574074	0	0.127427	0.00183486	0.000231364	0.338906
1204G	0.918919	0	0.0827132	0.00183486	0.0248485	0.476305
1205K	0.45996	0.95908	0.949852	0.990826	0.140854	0.744737
1206Y	0.962462	0	0.0138402	0.00183486	0.00277636	0.491112
1207E	0.8003	0.0230202	0.367487	0.0440367	0.0313266	0.531343
1208Q	0.471471	0.871082	0.78584	0.93945	0.095183	0.748128
1209Y	0.901401	0	0.0191809	0.00183486	0.00351673	0.49048
1210I	0.48999	0.0332178	0.417609	0.0348624	0.198973	0.4739
1211K	1	0	0.155091	0.00183486	0.135348	0.318521
1212W	1	0	0.252087	0.00183486	0.0770441	0.216339
1213P	1	0	0.30204	0.00183486	0.0187867	0.144031
1214W	1	0	0.322684	0.00183486	0.00277636	0.102908
1215Y	1	0	0.320665	0.00183486	0.0429874	0.147925
1216I	0.768268	0	0.29547	0.00183486	0.099255	0.220159
1217W	1	0	0.238617	0.00183486	0.157559	0.324091
1218L	1	0	0.130261	0.00183486	0.215862	0.482769
1219G	0.614615	0.764945	0.799064	0.937615	0.28895	0.754915	√
1220F	0.599099	0	9.3393e-05	0.00183486	0.000277636	0.515013
1221I	0.634134	0.611383	0.60827	0.886239	0.0567535	0.79129
1222A	0.563564	0.7275	0.651305	0.911927	0.00124936	0.764648
1223G	0.652152	0.689179	0.626134	0.900917	0	0.769062
1224L	0.628128	0.63527	0.682067	0.900917	0.17741	0.784131
1225I	0.603604	0	0.123744	0.00183486	0.116931	0.497882
1226A	0.8003	0	0.22309	0.00183486	0.0584425	0.333134
1227I	0.356356	0	0.265475	0.00183486	0.000832909	0.226206
1228V	0.321321	0	0.265484	0.00183486	0.00115682	0.222043
1229M	0.496997	0	0.223127	0.00183486	0.0590903	0.327122
1230V	0.366366	0	0.123817	0.00183486	0.117579	0.488219
1231T	0.432933	0.689762	0.818694	0.943119	0.384017	0.76611
1232I	0.565065	0	0.127709	0.00183486	0.149183	0.488519
1233M	0.532533	0	0.233156	0.00183486	0.0907871	0.327496
1234L	0.629129	0	0.283561	0.00183486	0.0324372	0.222368
1235C	0.774775	0	0.299954	0.00183486	0.000647818	0.152904
1236C	0.906406	0	0.283543	0.00183486	0.0270695	0.215917
1237M	0.532533	0	0.233115	0.00183486	0.0853269	0.318049
1238T	0.987487	0	0.127631	0.00183486	0.143723	0.473446
1239S	0.564064	0.857145	0.841865	0.941284	0.231688	0.738348
1240C	0.987487	0	6.31169e-05	0.00183486	0.000231364	0.474898
1241C	0.648649	0.85146	0.755194	0.93945	0.0293832	0.734691
1242S	0.641141	0.375546	0.377527	0.693578	0.0263292	0.825803
1243C	0.588589	0.406486	0.453176	0.759633	0.0755634	0.826514
1244L	0.556557	0	9.95649e-05	0.00183486	9.25455e-05	0.546642
1245K	0.473974	0.843531	0.800443	0.93945	0.0738513	0.739955
1246G	0	0	0.0496236	0.00183486	0.000509	0.473897
1247C	0	0	0.0496192	0.00183486	0.000925455	0.490132
1248C	0.420921	0.69021	0.677909	0.904587	0.0593679	0.770418
1249S	0.532032	0.754768	0.69977	0.922936	0.0473601	0.747548
1250C	0.987487	0	0.00808519	0.00183486	0.000370182	0.504412
1251G	0.630631	0.11945	0.456341	0.0788991	0.0433807	0.637508
1252S	0.358358	0.195018	0.379184	0.699083	0.198545	0.904837
1253C	1	0	0.0497672	0.00183486	0.00384064	0.559611
1254C	0.863363	0	0.0496597	0.00183486	0.000416455	0.469954
1255K	0.572573	0.936285	0.825061	0.950459	0.0552959	0.732693
1256F	0.364364	0.980929	0.812644	0.965138	0.000370182	0.716903
1257D	0.624625	0.939002	0.775375	0.948624	0	0.73291
1258E	0.405405	0.552899	0.587774	0.93211	0.00115682	0.799563
1259D	0.552553	0.732055	0.651789	0.910092	0.00208227	0.75996
1260D	0.404905	0.850211	0.749022	0.955963	0.0328074	0.740699
1261S	0.343343	0.144235	0.501485	0.0862385	0.0156402	0.577434
1262E	0.550551	0.00394048	0.0224932	0.00366972	0.00370182	0.51577
1263P	0.262262	0.711984	0.808151	0.985321	0.129749	0.769632
1264V	0.722723	0	0.065378	0.00183486	0.0227199	0.490071
1265L	0.37988	0	0.0865551	0.00183486	0.000740364	0.341274
1266K	0.71972	0.012908	0.11632	0.00733945	0.0382213	0.503187
1267G	0.302803	0.73479	0.864406	0.990826	0.43973	0.778082
1268V	0	0	0.137631	0.00183486	0.293138	0.495258
1269K	0	0	0.252632	0.00183486	0.234695	0.33168
1270L	0	0	0.327985	0.00183486	0.17616	0.225062
1271H	0	0	0.374122	0.00183486	0.117533	0.150066
1272Y	0	0	0.427712	0.00183486	0.0588126	0.0944404
1273T	0	0	0.207283	0	0	0.0515388
